# Supplementary material for: Host–guest inclusion complexes of RNA nucleosides inside aqueous cyclodextrins explored by physicochemical and spectroscopic methods
Source: Royal Society of Chemistry journal article supplement (doi:10.1039/c5ra24102b), 2016-01-01
Supplement: c5ra24102b1.pdf [file c5ra24102b1.pdf]

## RSC Advances

### Electronic supplementary information

#### Host-guest inclusion complexes of RNA nucleosides insight into aqueous cyclodextrins explored by physicochemical and spectroscopic contrivances

---

Mahendra Nath Roy,\* Subhadeep Saha, Siti Barman and Deepak Ekka

Department of Chemistry, University of North Bengal, Darjeeling-734013, India

E-mail: *mahendraroy2002@yahoo.co.in*

---

#### Theory:

The physical properties of binary mixtures in different molarity ( $w_n=0.001, 0.0025, 0.004$ , where  $n=1, 2$  for  $\alpha$  and  $\beta$ -CD respectively) of aqueous  $\alpha$  and  $\beta$ -CD solutions at 298.15K have been reported in table S1. The values of density, viscosity, refractive index, and ultrasonic speed of RNA nucleosides (*i.e.*, adenosine, guanosine, uridine and cytidine) in different molarity of aqueous  $\alpha$  and  $\beta$ -CD mixture, as a function of concentration (molality) has been listed in tables given below.

#### Surface tension

The concentrations at which the inclusion occurred (the break point of the surface tension) have been calculated by solving the equation of two straight lines, and represented in table 1. For instance, in case of adenosine in  $w_2=0.001$  molarity of  $\beta$ -cyclodextrin

$$\gamma = 985.61 c + 71.24$$

$$\gamma = 539.6 c + 73.92$$

$\gamma = 77.16 \text{ mN}\cdot\text{m}^{-1}$  and  $c = 6.00$  millimolal

#### Apparent molar volume

The apparent molar volumes  $\phi_V$  were determined from the solutions densities (Table S8) using the equation

$$\phi_V = M / \rho - 1000(\rho - \rho_o) / m \rho \rho_o \quad (1)$$

where  $M$  is the molar mass of the nucleosides,  $m$  is the molality of the solution,  $\rho$  and  $\rho_0$  are the density of the solution and aq.  $\alpha$  and  $\beta$ -CD mixture respectively. The limiting apparent molar volumes  $\phi_V^0$  were obtained by a least-square treatment to the plots of  $\phi_V$  versus  $\sqrt{m}$  using the Masson equation and shown in table S4.<sup>1</sup>

$$\phi_V = \phi_V^0 + S_V^* \cdot \sqrt{m} \quad (2)$$

### Viscosity

The experimental viscosity data for the studied systems are listed in table S8. The relative viscosity ( $\eta_r$ ) has been analyzed using the Jones-Dole equation.<sup>2</sup>

$$(\eta/\eta_0 - 1)/\sqrt{m} = (\eta_r - 1)/\sqrt{m} = A + B\sqrt{m} \quad (3)$$

where  $\eta_r = \eta/\eta_0$ ,  $\eta$  and  $\eta_0$  are the relative viscosities, the viscosities of the ternary solutions (nucleoside + aq. CD) and binary aqueous mixture (aq. CD) and  $m$  is the molality of the nucleosides in ternary solutions.  $A$  and  $B$  are empirical constants known as viscosity  $A$  and  $B$ -coefficients, which are specific to solute-solute and solute-solvent interactions, respectively, are estimated by least-square method by plotting  $(\eta_r - 1)/\sqrt{m}$  against  $\sqrt{m}$ , and reported in table S9.

### Ultrasonic speed

The adiabatic compressibility is defined by the thermodynamic relation:

$$\beta_s = -\frac{1}{V} \left( \frac{\partial V}{\partial P} \right)_S \quad (4)$$

where  $V$  is volume,  $P$  is pressure and  $S$  is entropy, is related to the solution density  $\rho$ , and the ultrasonic speed ( $u$ ), by the Newton-Laplace's equation:

$$\beta_s = 1/u^2 \rho \quad (5)$$

which provides the relation between thermodynamics and acoustics. The apparent molar adiabatic compressibility ( $\phi_K$ ), of the solutions was determined from the following relation,

$$\phi_K = M\beta_s / \rho + 1000(\beta_s \rho_0 - \beta_o \rho) / m \rho \rho_0 \quad (6)$$

where  $\beta_0, \beta_s$  are the adiabatic compressibility of the binary mixture and ternary solution respectively and  $m$  is the molality of the ternary solution. Limiting apparent molar adiabatic compressibilities ( $\phi_K^0$ ) or apparent molar adiabatic compressibility at infinite dilution and experimental slopes ( $S_K^*$ ), were obtained by fitting  $\phi_K$  against the square root of concentration ( $\sqrt{m}$ ) using the least squares method.<sup>3</sup>

$$\phi_K = \phi_K^0 + S_K^* \cdot \sqrt{m} \quad (7)$$

The values of  $\phi_K^0$  are presented in Table S6. The value of  $\phi_K^0$  is an important parameter that provides information about the extent of solute-solvent interaction. The behavior is useful in characteristic of solvation and electrostriction (the contraction of the solvent around the solute) in solutions.

### Refractive index

The molar refraction,  $R_M$  can be evaluated from the Lorentz-Lorenz relation.<sup>4</sup>

$$R_M = \left\{ \frac{n_D^2 - 1}{n_D^2 + 2} \right\} (M / \rho) \quad (8)$$

where  $R_M, n_D, M$  and  $\rho$  are the molar refraction, the refractive index, the molar mass and the density of solution respectively. The Limiting molar refraction ( $R_M^0$ ) estimated from the following equation,<sup>5</sup>

$$R_M = R_M^0 + R_S \sqrt{m} \quad (9)$$

### References:

- 1 D.O. Masson, *Phil Mag.*, 1929, **8**, 218-223.
- 2 G. Jones and D. Dole, *J. Am. Chem. Soc.*, 1929, **51**, 2950-2964.
- 3 D. Ekka and M. N. Roy, *Amino Acids*, 2013, **45**, 755-777.
- 4 V. Minkin, O. Osipov and Y. Zhdanov, *Dipole Moments in Organic Chemistry*, Plenum Press, New York, 1970.
- 5 M. N. Roy, P. Chakraborti and D. Ekka, *Mol. Phys.*, 2014, **112**, 2215.

## Tables

**Table S1. Experimental values of density ( $\rho$ ), viscosity ( $\eta$ ), refractive index ( $n_D$ ), surface tension ( $\gamma$ ), pH and ultrasonic sound ( $u$ ) in deferent molarity of aqueous  $\alpha$  and  $\beta$ -cyclodextrin mixtures:**

| aq. solvent mixture | Temp /K <sup>a</sup> | $\rho \cdot 10^{-3}$ /kg·m <sup>-3</sup> | $\eta$ /mP·s | $n_D$  | $\gamma$ /mN·m <sup>-1</sup> | pH   | $u$ /m·s <sup>-1</sup> |
|---------------------|----------------------|------------------------------------------|--------------|--------|------------------------------|------|------------------------|
| $w_1=0.001^b$       | 298.15               | 0.99742                                  | 1.300        | 1.3000 | 71.78                        | 6.43 | 1492.5                 |
|                     | 303.15               | 0.99600                                  | 1.202        | -      | -                            | -    | -                      |
|                     | 308.15               | 0.99412                                  | 1.098        | -      | -                            | -    | -                      |
| $w_1=0.0025^b$      | 298.15               | 0.99794                                  | 1.308        | 1.3070 | 71.71                        | 6.40 | 1493.5                 |
|                     | 303.15               | 0.99653                                  | 1.210        | -      | -                            | -    | -                      |
|                     | 308.15               | 0.99470                                  | 1.105        | -      | -                            | -    | -                      |
| $w_1=0.004^b$       | 298.15               | 0.99846                                  | 1.315        | 1.3170 | 71.65                        | 6.35 | 1494.7                 |
|                     | 303.15               | 0.99708                                  | 1.217        | -      | -                            | -    | -                      |
|                     | 308.15               | 0.99532                                  | 1.113        | -      | -                            | -    | -                      |
| $w_2=0.001^b$       | 298.15               | 0.99758                                  | 1.306        | 1.3040 | 71.75                        | 6.64 | 1490.4                 |
|                     | 303.15               | 0.99622                                  | 1.207        | -      | -                            | -    | -                      |
|                     | 308.15               | 0.99442                                  | 1.103        | -      | -                            | -    | -                      |
| $w_2=0.0025^b$      | 298.15               | 0.99809                                  | 1.313        | 1.3110 | 71.69                        | 6.59 | 1491.5                 |
|                     | 303.15               | 0.99675                                  | 1.213        | -      | -                            | -    | -                      |
|                     | 308.15               | 0.99500                                  | 1.108        | -      | -                            | -    | -                      |
| $w_2=0.004^b$       | 298.15               | 0.99861                                  | 1.322        | 1.3200 | 71.62                        | 6.52 | 1492.6                 |
|                     | 303.15               | 0.99730                                  | 1.221        | -      | -                            | -    | -                      |
|                     | 308.15               | 0.99552                                  | 1.115        | -      | -                            | -    | -                      |

<sup>a</sup> Standard uncertainties in temperature (T) =  $\pm 0.01$  K.

<sup>b</sup>  $w_1$  and  $w_2$  are the molarity of  $\alpha$  and  $\beta$ -CD in aqueous mixture respectively.

**Table S2 Data for the Job plot performed by UV-Vis spectroscopy for aqueous uridine- $\alpha$ -CD system:**

| Uridine (mL) | $\alpha$ -CD (mL) | Uridine ( $\mu$ M) | $\alpha$ -CD ( $\mu$ M) | $[U]/([U]+[\alpha\text{-CD}])$ | Absorbance (A) | $\Delta A$ | $\Delta A \times [U]/([U]+[\alpha\text{-CD}])$ |
|--------------|-------------------|--------------------|-------------------------|--------------------------------|----------------|------------|------------------------------------------------|
| 0.0          | 1.0               | 0                  | 100                     | 0.0                            | 0.00           | 0.96       | 0.000                                          |
| 0.1          | 0.9               | 10                 | 90                      | 0.1                            | 0.08           | 0.88       | 0.088                                          |
| 0.2          | 0.8               | 20                 | 80                      | 0.2                            | 0.17           | 0.79       | 0.158                                          |
| 0.3          | 0.7               | 30                 | 70                      | 0.3                            | 0.28           | 0.68       | 0.204                                          |
| 0.4          | 0.6               | 40                 | 60                      | 0.4                            | 0.37           | 0.59       | 0.236                                          |
| 0.5          | 0.5               | 50                 | 50                      | 0.5                            | 0.45           | 0.51       | 0.255                                          |
| 0.6          | 0.4               | 60                 | 40                      | 0.6                            | 0.57           | 0.39       | 0.234                                          |
| 0.7          | 0.3               | 70                 | 30                      | 0.7                            | 0.68           | 0.28       | 0.196                                          |
| 0.8          | 0.2               | 80                 | 20                      | 0.8                            | 0.79           | 0.17       | 0.136                                          |
| 0.9          | 0.1               | 90                 | 10                      | 0.9                            | 0.88           | 0.08       | 0.072                                          |
| 1.0          | 0.0               | 100                | 0                       | 1.0                            | 0.96           | 0.00       | 0.000                                          |

**Table S3 Data for the Job plot performed by UV-Vis spectroscopy for aqueous cytidine- $\alpha$ -CD system:**

| Cytidine (mL) | $\alpha$ -CD (mL) | Cytidine ( $\mu$ M) | $\alpha$ -CD ( $\mu$ M) | $[C]/([C]+[\alpha\text{-CD}])$ | Absorbance (A) | $\Delta A$ | $\Delta A \times [C]/([C]+[\alpha\text{-CD}])$ |
|---------------|-------------------|---------------------|-------------------------|--------------------------------|----------------|------------|------------------------------------------------|
| 0.0           | 1.0               | 0                   | 100                     | 0.0                            | 0.00           | 0.78       | 0.000                                          |
| 0.1           | 0.9               | 10                  | 90                      | 0.1                            | 0.06           | 0.72       | 0.072                                          |
| 0.2           | 0.8               | 20                  | 80                      | 0.2                            | 0.14           | 0.64       | 0.128                                          |
| 0.3           | 0.7               | 30                  | 70                      | 0.3                            | 0.21           | 0.57       | 0.171                                          |
| 0.4           | 0.6               | 40                  | 60                      | 0.4                            | 0.29           | 0.49       | 0.196                                          |
| 0.5           | 0.5               | 50                  | 50                      | 0.5                            | 0.37           | 0.41       | 0.205                                          |
| 0.6           | 0.4               | 60                  | 40                      | 0.6                            | 0.45           | 0.33       | 0.198                                          |
| 0.7           | 0.3               | 70                  | 30                      | 0.7                            | 0.53           | 0.25       | 0.175                                          |
| 0.8           | 0.2               | 80                  | 20                      | 0.8                            | 0.61           | 0.17       | 0.136                                          |
| 0.9           | 0.1               | 90                  | 10                      | 0.9                            | 0.69           | 0.09       | 0.081                                          |
| 1.0           | 0.0               | 100                 | 0                       | 1.0                            | 0.78           | 0.00       | 0.000                                          |

**Table S4 Data for the Job plot performed by UV-Vis spectroscopy for aqueous adenosine- $\beta$ -CD system:**

| Adenosine (mL) | $\beta$ -CD (mL) | Adenosine ( $\mu$ M) | $\beta$ -CD ( $\mu$ M) | $[A]/([A]+[\beta\text{-CD}])$ | Absorbance (A) | $\Delta A$ | $\Delta A \times [A]/([A]+[\beta\text{-CD}])$ |
|----------------|------------------|----------------------|------------------------|-------------------------------|----------------|------------|-----------------------------------------------|
| 0.0            | 1.0              | 0                    | 100                    | 0.0                           | 0.00           | 0.92       | 0.000                                         |
| 0.1            | 0.9              | 10                   | 90                     | 0.1                           | 0.08           | 0.84       | 0.084                                         |
| 0.2            | 0.8              | 20                   | 80                     | 0.2                           | 0.16           | 0.76       | 0.152                                         |
| 0.3            | 0.7              | 30                   | 70                     | 0.3                           | 0.25           | 0.67       | 0.201                                         |
| 0.4            | 0.6              | 40                   | 60                     | 0.4                           | 0.35           | 0.57       | 0.228                                         |
| 0.5            | 0.5              | 50                   | 50                     | 0.5                           | 0.44           | 0.48       | 0.240                                         |
| 0.6            | 0.4              | 60                   | 40                     | 0.6                           | 0.54           | 0.38       | 0.228                                         |
| 0.7            | 0.3              | 70                   | 30                     | 0.7                           | 0.63           | 0.29       | 0.203                                         |
| 0.8            | 0.2              | 80                   | 20                     | 0.8                           | 0.72           | 0.20       | 0.160                                         |
| 0.9            | 0.1              | 90                   | 10                     | 0.9                           | 0.81           | 0.11       | 0.099                                         |
| 1.0            | 0.0              | 100                  | 0                      | 1.0                           | 0.92           | 0.00       | 0.000                                         |

**Table S5 Data for the Job plot performed by UV-Vis spectroscopy for aqueous guanosine- $\beta$ -CD system:**

| Guanosine (mL) | $\beta$ -CD (mL) | Guanosine ( $\mu$ M) | $\beta$ -CD ( $\mu$ M) | $[G]/([G]+[\beta\text{-CD}])$ | Absorbance (A) | $\Delta A$ | $\Delta A \times [G]/([G]+[\beta\text{-CD}])$ |
|----------------|------------------|----------------------|------------------------|-------------------------------|----------------|------------|-----------------------------------------------|
| 0.0            | 1.0              | 0                    | 100                    | 0.0                           | 0.00           | 1.02       | 0.000                                         |
| 0.1            | 0.9              | 10                   | 90                     | 0.1                           | 0.09           | 0.93       | 0.093                                         |
| 0.2            | 0.8              | 20                   | 80                     | 0.2                           | 0.20           | 0.82       | 0.164                                         |
| 0.3            | 0.7              | 30                   | 70                     | 0.3                           | 0.29           | 0.73       | 0.219                                         |
| 0.4            | 0.6              | 40                   | 60                     | 0.4                           | 0.41           | 0.61       | 0.244                                         |
| 0.5            | 0.5              | 50                   | 50                     | 0.5                           | 0.50           | 0.52       | 0.260                                         |
| 0.6            | 0.4              | 60                   | 40                     | 0.6                           | 0.62           | 0.40       | 0.240                                         |
| 0.7            | 0.3              | 70                   | 30                     | 0.7                           | 0.71           | 0.31       | 0.217                                         |
| 0.8            | 0.2              | 80                   | 20                     | 0.8                           | 0.81           | 0.21       | 0.168                                         |
| 0.9            | 0.1              | 90                   | 10                     | 0.9                           | 0.91           | 0.11       | 0.099                                         |
| 1.0            | 0.0              | 100                  | 0                      | 1.0                           | 1.02           | 0.00       | 0.000                                         |

**Table S6 Data for the Job plot performed by UV-Vis spectroscopy for aqueous uridine- $\beta$ -CD system:**

| Uridine (mL) | $\beta$ -CD (mL) | Uridine ( $\mu$ M) | $\beta$ -CD ( $\mu$ M) | $[U]/([U]+[\beta\text{-CD}])$ | Absorbance (A) | $\Delta A$ | $\Delta A \times [U]/([U]+[\beta\text{-CD}])$ |
|--------------|------------------|--------------------|------------------------|-------------------------------|----------------|------------|-----------------------------------------------|
| 0.0          | 1.0              | 0                  | 100                    | 0.0                           | 0.00           | 1.01       | 0.000                                         |
| 0.1          | 0.9              | 10                 | 90                     | 0.1                           | 0.11           | 0.90       | 0.090                                         |
| 0.2          | 0.8              | 20                 | 80                     | 0.2                           | 0.20           | 0.81       | 0.162                                         |
| 0.3          | 0.7              | 30                 | 70                     | 0.3                           | 0.31           | 0.70       | 0.210                                         |
| 0.4          | 0.6              | 40                 | 60                     | 0.4                           | 0.41           | 0.60       | 0.240                                         |
| 0.5          | 0.5              | 50                 | 50                     | 0.5                           | 0.50           | 0.51       | 0.255                                         |
| 0.6          | 0.4              | 60                 | 40                     | 0.6                           | 0.61           | 0.40       | 0.240                                         |
| 0.7          | 0.3              | 70                 | 30                     | 0.7                           | 0.71           | 0.30       | 0.210                                         |
| 0.8          | 0.2              | 80                 | 20                     | 0.8                           | 0.82           | 0.19       | 0.152                                         |
| 0.9          | 0.1              | 90                 | 10                     | 0.9                           | 0.90           | 0.11       | 0.099                                         |
| 1.0          | 0.0              | 100                | 0                      | 1.0                           | 1.01           | 0.00       | 0.000                                         |

**Table S7 Data for the Job plot performed by UV-Vis spectroscopy for aqueous cytidine- $\beta$ -CD system:**

| Cytidine (mL) | $\beta$ -CD (mL) | Cytidine ( $\mu$ M) | $\beta$ -CD ( $\mu$ M) | $[C]/([C]+[\beta\text{-CD}])$ | Absorbance (A) | $\Delta A$ | $\Delta A \times [C]/([C]+[\beta\text{-CD}])$ |
|---------------|------------------|---------------------|------------------------|-------------------------------|----------------|------------|-----------------------------------------------|
| 0.0           | 1.0              | 0                   | 100                    | 0.0                           | 0.00           | 0.99       | 0.000                                         |
| 0.1           | 0.9              | 10                  | 90                     | 0.1                           | 0.08           | 0.91       | 0.091                                         |
| 0.2           | 0.8              | 20                  | 80                     | 0.2                           | 0.19           | 0.80       | 0.160                                         |
| 0.3           | 0.7              | 30                  | 70                     | 0.3                           | 0.28           | 0.71       | 0.213                                         |
| 0.4           | 0.6              | 40                  | 60                     | 0.4                           | 0.39           | 0.60       | 0.240                                         |
| 0.5           | 0.5              | 50                  | 50                     | 0.5                           | 0.48           | 0.51       | 0.255                                         |
| 0.6           | 0.4              | 60                  | 40                     | 0.6                           | 0.60           | 0.39       | 0.234                                         |
| 0.7           | 0.3              | 70                  | 30                     | 0.7                           | 0.71           | 0.28       | 0.196                                         |
| 0.8           | 0.2              | 80                  | 20                     | 0.8                           | 0.79           | 0.20       | 0.160                                         |
| 0.9           | 0.1              | 90                  | 10                     | 0.9                           | 0.90           | 0.09       | 0.081                                         |
| 1.0           | 0.0              | 100                 | 0                      | 1.0                           | 0.99           | 0.00       | 0.000                                         |

**Table S8. Experimental values of densities ( $\rho$ ) and viscosities ( $\eta$ ) corresponding to concentrations of nucleosides in different molarity of aq.  $\alpha$  and  $\beta$ -cyclodextrin at different temperature**

| Conc<br>( <i>m</i> )                      | $\rho \cdot 10^{-3}$<br>/kg·m <sup>-3</sup> | $\eta$<br>/mP·s | Conc<br>( <i>m</i> ) | $\rho \cdot 10^{-3}$<br>/kg·m <sup>-3</sup> | $\eta$<br>/mP·s | Conc<br>( <i>m</i> ) | $\rho \cdot 10^{-3}$<br>/kg·m <sup>-3</sup> | $\eta$<br>/mP·s |
|-------------------------------------------|---------------------------------------------|-----------------|----------------------|---------------------------------------------|-----------------|----------------------|---------------------------------------------|-----------------|
| 298.15 K <sup>a</sup>                     |                                             |                 | 303.15K <sup>a</sup> |                                             |                 | 308.15K <sup>a</sup> |                                             |                 |
| <i>w</i> <sub>1</sub> =0.001 <sup>b</sup> |                                             |                 |                      |                                             |                 |                      |                                             |                 |
| Adenosine                                 |                                             |                 |                      |                                             |                 |                      |                                             |                 |
| 0.0010                                    | 0.99748                                     | 1.310           | 0.0010               | 0.99610                                     | 1.211           | 0.0010               | 0.99426                                     | 1.105           |
| 0.0025                                    | 0.99761                                     | 1.318           | 0.0025               | 0.99628                                     | 1.217           | 0.0025               | 0.99449                                     | 1.111           |
| 0.0040                                    | 0.99775                                     | 1.325           | 0.0040               | 0.99648                                     | 1.223           | 0.0040               | 0.99474                                     | 1.115           |
| 0.0055                                    | 0.99791                                     | 1.332           | 0.0055               | 0.99670                                     | 1.229           | 0.0055               | 0.99500                                     | 1.120           |
| 0.0070                                    | 0.99809                                     | 1.338           | 0.0070               | 0.99693                                     | 1.234           | 0.0070               | 0.99527                                     | 1.124           |
| 0.0085                                    | 0.99827                                     | 1.344           | 0.0085               | 0.99717                                     | 1.239           | 0.0086               | 0.99555                                     | 1.127           |
| Guanosine                                 |                                             |                 |                      |                                             |                 |                      |                                             |                 |
| 0.0010                                    | 0.99749                                     | 1.310           | 0.0010               | 0.99610                                     | 1.211           | 0.0010               | 0.99426                                     | 1.106           |
| 0.0025                                    | 0.99763                                     | 1.319           | 0.0025               | 0.99629                                     | 1.218           | 0.0025               | 0.99450                                     | 1.111           |
| 0.0040                                    | 0.99779                                     | 1.327           | 0.0040               | 0.99650                                     | 1.224           | 0.0040               | 0.99476                                     | 1.116           |
| 0.0055                                    | 0.99798                                     | 1.334           | 0.0055               | 0.99673                                     | 1.230           | 0.0055               | 0.99503                                     | 1.121           |
| 0.0070                                    | 0.99818                                     | 1.342           | 0.0070               | 0.99698                                     | 1.236           | 0.0070               | 0.99531                                     | 1.126           |
| 0.0085                                    | 0.99842                                     | 1.348           | 0.0085               | 0.99724                                     | 1.241           | 0.0086               | 0.99560                                     | 1.130           |
| Uridine                                   |                                             |                 |                      |                                             |                 |                      |                                             |                 |
| 0.0010                                    | 0.99744                                     | 1.311           | 0.0010               | 0.99605                                     | 1.211           | 0.0010               | 0.99421                                     | 1.106           |
| 0.0025                                    | 0.99749                                     | 1.320           | 0.0025               | 0.99617                                     | 1.219           | 0.0025               | 0.99437                                     | 1.112           |
| 0.0040                                    | 0.99758                                     | 1.329           | 0.0040               | 0.99631                                     | 1.226           | 0.0040               | 0.99456                                     | 1.118           |
| 0.0055                                    | 0.99769                                     | 1.337           | 0.0055               | 0.99648                                     | 1.232           | 0.0055               | 0.99477                                     | 1.123           |
| 0.0070                                    | 0.99783                                     | 1.344           | 0.0070               | 0.99666                                     | 1.238           | 0.0070               | 0.99498                                     | 1.128           |
| 0.0085                                    | 0.99798                                     | 1.352           | 0.0085               | 0.99685                                     | 1.244           | 0.0086               | 0.99520                                     | 1.133           |
| Cytidine                                  |                                             |                 |                      |                                             |                 |                      |                                             |                 |
| 0.0010                                    | 0.99743                                     | 1.311           | 0.0010               | 0.99604                                     | 1.211           | 0.0010               | 0.99420                                     | 1.106           |



|        |         |       |        |         |       |        |         |       |
|--------|---------|-------|--------|---------|-------|--------|---------|-------|
| 0.0025 | 0.99746 | 1.321 | 0.0025 | 0.99613 | 1.219 | 0.0025 | 0.99435 | 1.113 |
| 0.0040 | 0.99753 | 1.330 | 0.0040 | 0.99625 | 1.226 | 0.0040 | 0.99453 | 1.119 |
| 0.0055 | 0.99762 | 1.339 | 0.0055 | 0.99640 | 1.233 | 0.0055 | 0.99472 | 1.125 |
| 0.0070 | 0.99774 | 1.348 | 0.0070 | 0.99656 | 1.240 | 0.0070 | 0.99492 | 1.130 |
| 0.0085 | 0.99790 | 1.356 | 0.0085 | 0.99674 | 1.246 | 0.0086 | 0.99514 | 1.135 |

$w_1=0.0025^b$

Adenosine

|        |         |       |        |         |       |        |         |       |
|--------|---------|-------|--------|---------|-------|--------|---------|-------|
| 0.0010 | 0.99800 | 1.318 | 0.0010 | 0.99662 | 1.219 | 0.0010 | 0.99483 | 1.113 |
| 0.0025 | 0.99812 | 1.327 | 0.0025 | 0.99679 | 1.226 | 0.0025 | 0.99505 | 1.118 |
| 0.0040 | 0.99827 | 1.335 | 0.0040 | 0.99699 | 1.232 | 0.0040 | 0.99530 | 1.123 |
| 0.0055 | 0.99845 | 1.342 | 0.0055 | 0.99720 | 1.238 | 0.0055 | 0.99555 | 1.128 |
| 0.0070 | 0.99864 | 1.349 | 0.0070 | 0.99743 | 1.243 | 0.0070 | 0.99581 | 1.132 |
| 0.0085 | 0.99884 | 1.356 | 0.0085 | 0.99767 | 1.249 | 0.0086 | 0.99609 | 1.136 |

Guanosine

|        |         |       |        |         |       |        |         |       |
|--------|---------|-------|--------|---------|-------|--------|---------|-------|
| 0.0010 | 0.99801 | 1.318 | 0.0010 | 0.99663 | 1.219 | 0.0010 | 0.99484 | 1.113 |
| 0.0025 | 0.99814 | 1.328 | 0.0025 | 0.99681 | 1.226 | 0.0025 | 0.99507 | 1.119 |
| 0.0040 | 0.99831 | 1.336 | 0.0040 | 0.99702 | 1.233 | 0.0040 | 0.99533 | 1.124 |
| 0.0055 | 0.99850 | 1.343 | 0.0055 | 0.99725 | 1.239 | 0.0055 | 0.99560 | 1.129 |
| 0.0070 | 0.99871 | 1.350 | 0.0070 | 0.99749 | 1.245 | 0.0070 | 0.99587 | 1.134 |
| 0.0085 | 0.99895 | 1.357 | 0.0085 | 0.99775 | 1.251 | 0.0086 | 0.99616 | 1.138 |

Uridine

|        |         |       |        |         |       |        |         |       |
|--------|---------|-------|--------|---------|-------|--------|---------|-------|
| 0.0010 | 0.99796 | 1.319 | 0.0010 | 0.99658 | 1.219 | 0.0010 | 0.99479 | 1.113 |
| 0.0025 | 0.99802 | 1.328 | 0.0025 | 0.99669 | 1.227 | 0.0025 | 0.99495 | 1.119 |
| 0.0040 | 0.99812 | 1.337 | 0.0040 | 0.99683 | 1.234 | 0.0040 | 0.99514 | 1.125 |
| 0.0055 | 0.99824 | 1.345 | 0.0055 | 0.99700 | 1.240 | 0.0055 | 0.99534 | 1.130 |
| 0.0070 | 0.99840 | 1.353 | 0.0070 | 0.99717 | 1.247 | 0.0070 | 0.99556 | 1.135 |
| 0.0085 | 0.99857 | 1.361 | 0.0085 | 0.99736 | 1.253 | 0.0086 | 0.99579 | 1.140 |

Cytidine

|        |         |       |        |         |       |        |         |       |
|--------|---------|-------|--------|---------|-------|--------|---------|-------|
| 0.0010 | 0.99795 | 1.319 | 0.0010 | 0.99657 | 1.220 | 0.0010 | 0.99478 | 1.113 |
| 0.0025 | 0.99799 | 1.329 | 0.0025 | 0.99667 | 1.227 | 0.0025 | 0.99493 | 1.120 |

|               |         |       |        |         |       |        |         |       |
|---------------|---------|-------|--------|---------|-------|--------|---------|-------|
| 0.0040        | 0.99807 | 1.339 | 0.0040 | 0.99680 | 1.235 | 0.0040 | 0.99510 | 1.126 |
| 0.0055        | 0.99819 | 1.348 | 0.0055 | 0.99696 | 1.241 | 0.0055 | 0.99530 | 1.132 |
| 0.0070        | 0.99834 | 1.356 | 0.0070 | 0.99713 | 1.249 | 0.0070 | 0.99550 | 1.137 |
| 0.0085        | 0.99851 | 1.365 | 0.0085 | 0.99732 | 1.255 | 0.0086 | 0.99574 | 1.143 |
| $w_1=0.004^b$ |         |       |        |         |       |        |         |       |
| Adenosine     |         |       |        |         |       |        |         |       |
| 0.0010        | 0.99851 | 1.326 | 0.0010 | 0.99716 | 1.226 | 0.0010 | 0.99544 | 1.121 |
| 0.0025        | 0.99863 | 1.336 | 0.0025 | 0.99732 | 1.234 | 0.0025 | 0.99566 | 1.127 |
| 0.0040        | 0.99878 | 1.344 | 0.0040 | 0.99751 | 1.241 | 0.0040 | 0.99590 | 1.132 |
| 0.0055        | 0.99895 | 1.352 | 0.0055 | 0.99772 | 1.247 | 0.0055 | 0.99615 | 1.137 |
| 0.0070        | 0.99914 | 1.359 | 0.0070 | 0.99794 | 1.253 | 0.0070 | 0.99640 | 1.142 |
| 0.0085        | 0.99933 | 1.367 | 0.0085 | 0.99817 | 1.259 | 0.0085 | 0.99668 | 1.147 |
| Guanosine     |         |       |        |         |       |        |         |       |
| 0.0010        | 0.99852 | 1.326 | 0.0010 | 0.99717 | 1.226 | 0.0010 | 0.99545 | 1.121 |
| 0.0025        | 0.99865 | 1.336 | 0.0025 | 0.99735 | 1.234 | 0.0025 | 0.99568 | 1.127 |
| 0.0040        | 0.99881 | 1.345 | 0.0040 | 0.99755 | 1.242 | 0.0040 | 0.99593 | 1.133 |
| 0.0055        | 0.99899 | 1.354 | 0.0055 | 0.99777 | 1.248 | 0.0055 | 0.99620 | 1.139 |
| 0.0070        | 0.99919 | 1.362 | 0.0070 | 0.99801 | 1.255 | 0.0070 | 0.99647 | 1.144 |
| 0.0085        | 0.99942 | 1.370 | 0.0085 | 0.99826 | 1.262 | 0.0085 | 0.99677 | 1.149 |
| Uridine       |         |       |        |         |       |        |         |       |
| 0.0010        | 0.99847 | 1.326 | 0.0010 | 0.99712 | 1.226 | 0.0010 | 0.99540 | 1.121 |
| 0.0025        | 0.99853 | 1.337 | 0.0025 | 0.99723 | 1.235 | 0.0025 | 0.99556 | 1.128 |
| 0.0040        | 0.99862 | 1.347 | 0.0040 | 0.99737 | 1.243 | 0.0040 | 0.99574 | 1.134 |
| 0.0055        | 0.99874 | 1.356 | 0.0055 | 0.99753 | 1.250 | 0.0055 | 0.99595 | 1.140 |
| 0.0070        | 0.99889 | 1.364 | 0.0070 | 0.99770 | 1.257 | 0.0070 | 0.99615 | 1.146 |
| 0.0085        | 0.99905 | 1.373 | 0.0085 | 0.99789 | 1.264 | 0.0085 | 0.99638 | 1.151 |
| Cytidine      |         |       |        |         |       |        |         |       |
| 0.0010        | 0.99846 | 1.326 | 0.0010 | 0.99711 | 1.227 | 0.0010 | 0.99539 | 1.121 |
| 0.0025        | 0.99850 | 1.338 | 0.0025 | 0.99721 | 1.236 | 0.0025 | 0.99553 | 1.128 |
| 0.0040        | 0.99858 | 1.348 | 0.0040 | 0.99733 | 1.244 | 0.0040 | 0.99570 | 1.135 |

|               |         |       |        |         |       |        |         |       |
|---------------|---------|-------|--------|---------|-------|--------|---------|-------|
| 0.0055        | 0.99870 | 1.358 | 0.0055 | 0.99748 | 1.251 | 0.0055 | 0.99590 | 1.141 |
| 0.0070        | 0.99885 | 1.367 | 0.0070 | 0.99765 | 1.259 | 0.0070 | 0.99610 | 1.147 |
| 0.0085        | 0.99901 | 1.376 | 0.0085 | 0.99782 | 1.266 | 0.0085 | 0.99631 | 1.153 |
| $w_2=0.001^b$ |         |       |        |         |       |        |         |       |
| Adenosine     |         |       |        |         |       |        |         |       |
| 0.0010        | 0.99760 | 1.317 | 0.0010 | 0.99627 | 1.217 | 0.0010 | 0.99451 | 1.111 |
| 0.0025        | 0.99769 | 1.328 | 0.0025 | 0.99639 | 1.225 | 0.0025 | 0.99467 | 1.118 |
| 0.0040        | 0.99781 | 1.337 | 0.0040 | 0.99655 | 1.233 | 0.0040 | 0.99486 | 1.124 |
| 0.0055        | 0.99797 | 1.347 | 0.0055 | 0.99673 | 1.240 | 0.0055 | 0.99506 | 1.130 |
| 0.0070        | 0.99816 | 1.356 | 0.0070 | 0.99694 | 1.247 | 0.0070 | 0.99528 | 1.136 |
| 0.0085        | 0.99838 | 1.366 | 0.0085 | 0.99717 | 1.254 | 0.0086 | 0.99552 | 1.142 |
| Guanosine     |         |       |        |         |       |        |         |       |
| 0.0010        | 0.99761 | 1.317 | 0.0010 | 0.99628 | 1.217 | 0.0010 | 0.99451 | 1.111 |
| 0.0025        | 0.99771 | 1.328 | 0.0025 | 0.99642 | 1.226 | 0.0025 | 0.99469 | 1.118 |
| 0.0040        | 0.99785 | 1.339 | 0.0040 | 0.99658 | 1.234 | 0.0040 | 0.99489 | 1.125 |
| 0.0055        | 0.99802 | 1.349 | 0.0055 | 0.99680 | 1.241 | 0.0055 | 0.99512 | 1.131 |
| 0.0070        | 0.99824 | 1.359 | 0.0070 | 0.99703 | 1.249 | 0.0070 | 0.99536 | 1.138 |
| 0.0085        | 0.99845 | 1.369 | 0.0085 | 0.99729 | 1.256 | 0.0086 | 0.99562 | 1.144 |
| Uridine       |         |       |        |         |       |        |         |       |
| 0.0010        | 0.99760 | 1.317 | 0.0010 | 0.99627 | 1.216 | 0.0010 | 0.99450 | 1.111 |
| 0.0025        | 0.99767 | 1.326 | 0.0025 | 0.99637 | 1.224 | 0.0025 | 0.99465 | 1.117 |
| 0.0040        | 0.99777 | 1.335 | 0.0040 | 0.99651 | 1.231 | 0.0040 | 0.99482 | 1.123 |
| 0.0055        | 0.99792 | 1.343 | 0.0055 | 0.99666 | 1.237 | 0.0055 | 0.99501 | 1.128 |
| 0.0070        | 0.99809 | 1.351 | 0.0070 | 0.99684 | 1.243 | 0.0070 | 0.99521 | 1.133 |
| 0.0085        | 0.99829 | 1.359 | 0.0085 | 0.99703 | 1.249 | 0.0086 | 0.99542 | 1.138 |
| Cytidine      |         |       |        |         |       |        |         |       |
| 0.0010        | 0.99759 | 1.317 | 0.0010 | 0.99626 | 1.216 | 0.0010 | 0.99449 | 1.111 |
| 0.0025        | 0.99765 | 1.327 | 0.0025 | 0.99635 | 1.224 | 0.0025 | 0.99463 | 1.117 |
| 0.0040        | 0.99774 | 1.336 | 0.0040 | 0.99648 | 1.232 | 0.0040 | 0.99479 | 1.123 |
| 0.0055        | 0.99787 | 1.345 | 0.0055 | 0.99663 | 1.239 | 0.0055 | 0.99497 | 1.129 |

|                |         |       |        |         |       |        |         |       |
|----------------|---------|-------|--------|---------|-------|--------|---------|-------|
| 0.0070         | 0.99805 | 1.354 | 0.0070 | 0.99680 | 1.245 | 0.0070 | 0.99516 | 1.135 |
| 0.0085         | 0.99825 | 1.362 | 0.0085 | 0.99699 | 1.252 | 0.0086 | 0.99537 | 1.140 |
| $w_2=0.0025^b$ |         |       |        |         |       |        |         |       |
| Adenosine      |         |       |        |         |       |        |         |       |
| 0.0010         | 0.99810 | 1.324 | 0.0010 | 0.99679 | 1.223 | 0.0010 | 0.99508 | 1.116 |
| 0.0025         | 0.99818 | 1.335 | 0.0025 | 0.99690 | 1.231 | 0.0025 | 0.99523 | 1.123 |
| 0.0040         | 0.99829 | 1.345 | 0.0040 | 0.99705 | 1.239 | 0.0040 | 0.99541 | 1.130 |
| 0.0055         | 0.99844 | 1.355 | 0.0055 | 0.99722 | 1.247 | 0.0055 | 0.99561 | 1.136 |
| 0.0070         | 0.99862 | 1.365 | 0.0070 | 0.99742 | 1.255 | 0.0070 | 0.99582 | 1.142 |
| 0.0085         | 0.99882 | 1.375 | 0.0085 | 0.99766 | 1.262 | 0.0086 | 0.99605 | 1.148 |
| Guanosine      |         |       |        |         |       |        |         |       |
| 0.0010         | 0.99811 | 1.324 | 0.0010 | 0.99680 | 1.223 | 0.0010 | 0.99509 | 1.116 |
| 0.0025         | 0.99820 | 1.336 | 0.0025 | 0.99692 | 1.232 | 0.0025 | 0.99525 | 1.124 |
| 0.0040         | 0.99833 | 1.347 | 0.0040 | 0.99708 | 1.240 | 0.0040 | 0.99545 | 1.130 |
| 0.0055         | 0.99849 | 1.357 | 0.0055 | 0.99728 | 1.248 | 0.0055 | 0.99567 | 1.137 |
| 0.0070         | 0.99869 | 1.368 | 0.0070 | 0.99749 | 1.256 | 0.0070 | 0.99590 | 1.144 |
| 0.0085         | 0.99891 | 1.378 | 0.0085 | 0.99775 | 1.264 | 0.0086 | 0.99615 | 1.150 |
| Uridine        |         |       |        |         |       |        |         |       |
| 0.0010         | 0.99810 | 1.324 | 0.0010 | 0.99679 | 1.222 | 0.0010 | 0.99507 | 1.116 |
| 0.0025         | 0.99816 | 1.334 | 0.0025 | 0.99689 | 1.230 | 0.0025 | 0.99521 | 1.122 |
| 0.0040         | 0.99825 | 1.343 | 0.0040 | 0.99702 | 1.238 | 0.0040 | 0.99537 | 1.128 |
| 0.0055         | 0.99839 | 1.352 | 0.0055 | 0.99718 | 1.245 | 0.0055 | 0.99555 | 1.134 |
| 0.0070         | 0.99853 | 1.360 | 0.0070 | 0.99735 | 1.251 | 0.0070 | 0.99574 | 1.139 |
| 0.0085         | 0.99874 | 1.369 | 0.0085 | 0.99755 | 1.258 | 0.0086 | 0.99593 | 1.145 |
| Cytidine       |         |       |        |         |       |        |         |       |
| 0.0010         | 0.99809 | 1.324 | 0.0010 | 0.99678 | 1.223 | 0.0010 | 0.99506 | 1.116 |
| 0.0025         | 0.99814 | 1.334 | 0.0025 | 0.99686 | 1.231 | 0.0025 | 0.99519 | 1.123 |
| 0.0040         | 0.99823 | 1.344 | 0.0040 | 0.99699 | 1.238 | 0.0040 | 0.99534 | 1.129 |
| 0.0055         | 0.99837 | 1.353 | 0.0055 | 0.99713 | 1.246 | 0.0055 | 0.99551 | 1.135 |
| 0.0070         | 0.99851 | 1.362 | 0.0070 | 0.99731 | 1.253 | 0.0070 | 0.99569 | 1.141 |

|               |         |       |        |         |       |        |         |       |
|---------------|---------|-------|--------|---------|-------|--------|---------|-------|
| 0.0085        | 0.99870 | 1.371 | 0.0085 | 0.99750 | 1.260 | 0.0086 | 0.99589 | 1.146 |
| $w_2=0.004^b$ |         |       |        |         |       |        |         |       |
| Adenosine     |         |       |        |         |       |        |         |       |
| 0.0010        | 0.99861 | 1.333 | 0.0010 | 0.99733 | 1.231 | 0.0010 | 0.99559 | 1.123 |
| 0.0025        | 0.99868 | 1.345 | 0.0025 | 0.99743 | 1.240 | 0.0025 | 0.99574 | 1.131 |
| 0.0040        | 0.99878 | 1.356 | 0.0040 | 0.99757 | 1.249 | 0.0040 | 0.99591 | 1.137 |
| 0.0055        | 0.99891 | 1.366 | 0.0055 | 0.99774 | 1.257 | 0.0055 | 0.99610 | 1.144 |
| 0.0070        | 0.99908 | 1.376 | 0.0070 | 0.99794 | 1.265 | 0.0070 | 0.99631 | 1.151 |
| 0.0085        | 0.99929 | 1.387 | 0.0085 | 0.99816 | 1.273 | 0.0085 | 0.99653 | 1.157 |
| Guanosine     |         |       |        |         |       |        |         |       |
| 0.0010        | 0.99862 | 1.334 | 0.0010 | 0.99734 | 1.231 | 0.0010 | 0.99560 | 1.123 |
| 0.0025        | 0.99870 | 1.346 | 0.0025 | 0.99745 | 1.241 | 0.0025 | 0.99576 | 1.131 |
| 0.0040        | 0.99882 | 1.357 | 0.0040 | 0.99761 | 1.250 | 0.0040 | 0.99595 | 1.138 |
| 0.0055        | 0.99897 | 1.368 | 0.0055 | 0.99779 | 1.258 | 0.0055 | 0.99617 | 1.145 |
| 0.0070        | 0.99916 | 1.379 | 0.0070 | 0.99801 | 1.267 | 0.0070 | 0.99640 | 1.152 |
| 0.0085        | 0.99938 | 1.390 | 0.0085 | 0.99824 | 1.275 | 0.0085 | 0.99664 | 1.159 |
| Uridine       |         |       |        |         |       |        |         |       |
| 0.0010        | 0.99862 | 1.333 | 0.0010 | 0.99733 | 1.231 | 0.0010 | 0.99558 | 1.123 |
| 0.0025        | 0.99868 | 1.343 | 0.0025 | 0.99741 | 1.239 | 0.0025 | 0.99572 | 1.130 |
| 0.0040        | 0.99878 | 1.353 | 0.0040 | 0.99753 | 1.246 | 0.0040 | 0.99587 | 1.136 |
| 0.0055        | 0.99891 | 1.362 | 0.0055 | 0.99768 | 1.254 | 0.0055 | 0.99605 | 1.142 |
| 0.0070        | 0.99909 | 1.372 | 0.0070 | 0.99784 | 1.261 | 0.0070 | 0.99623 | 1.148 |
| 0.0085        | 0.99927 | 1.381 | 0.0085 | 0.99802 | 1.269 | 0.0085 | 0.99642 | 1.154 |
| Cytidine      |         |       |        |         |       |        |         |       |
| 0.0010        | 0.99861 | 1.333 | 0.0010 | 0.99732 | 1.231 | 0.0010 | 0.99558 | 1.123 |
| 0.0025        | 0.99865 | 1.344 | 0.0025 | 0.99739 | 1.239 | 0.0025 | 0.99570 | 1.130 |
| 0.0040        | 0.99874 | 1.354 | 0.0040 | 0.99751 | 1.247 | 0.0040 | 0.99584 | 1.137 |
| 0.0055        | 0.99886 | 1.363 | 0.0055 | 0.99765 | 1.255 | 0.0055 | 0.99601 | 1.143 |
| 0.0070        | 0.99901 | 1.373 | 0.0070 | 0.99781 | 1.263 | 0.0070 | 0.99618 | 1.149 |
| 0.0085        | 0.99918 | 1.383 | 0.0085 | 0.99800 | 1.271 | 0.0085 | 0.99637 | 1.156 |

<sup>a</sup> Standard uncertainties in temperature (T) = 0.01 K. <sup>b</sup>  $w_1$  and  $w_2$  are the molarity of  $\alpha$  and  $\beta$ -CD in aqueous mixture respectively.

**Table S9. Limiting apparent molar volume ( $\phi_v^0$ ), experimental slope ( $S_v^*$ ), viscosity  $B$  and A-coefficient of different nucleosides in deferent molarity of aqueous  $\alpha$  and  $\beta$ -cyclodextrin mixtures:**

| Temp /K <sup>a</sup> | $\phi_v^0 \times 10^6$ | $S_v^*$ | $B$   | $A$   |
|----------------------|------------------------|---------|-------|-------|
| $w_1=0.001^b$        |                        |         |       |       |
| Adenosine            |                        |         |       |       |
| 298.15               | 223.6                  | -745.1  | 2.066 | 0.175 |
| 303.15               | 187.4                  | -624.6  | 1.716 | 0.171 |
| 308.15               | 143.1                  | -471.3  | 1.338 | 0.164 |
| Guanosine            |                        |         |       |       |
| 298.15               | 238.7                  | -769.8  | 2.500 | 0.170 |
| 303.15               | 202.4                  | -695.4  | 1.963 | 0.171 |
| 308.15               | 157.5                  | -520.7  | 1.613 | 0.163 |
| Uridine              |                        |         |       |       |
| 298.15               | 256.9                  | -837.0  | 2.904 | 0.165 |
| 303.15               | 215.4                  | -769.1  | 2.249 | 0.169 |
| 308.15               | 175.5                  | -634.7  | 1.948 | 0.161 |
| Cytidine             |                        |         |       |       |
| 298.15               | 267                    | -828.9  | 3.302 | 0.159 |
| 303.15               | 230.3                  | -790.0  | 2.514 | 0.164 |
| 308.15               | 184.9                  | -663.7  | 2.203 | 0.162 |
| $w_1=0.0025^b$       |                        |         |       |       |
| Adenosine            |                        |         |       |       |
| 298.15               | 233.3                  | -776.8  | 2.410 | 0.170 |
| 303.15               | 198.8                  | -711.9  | 1.896 | 0.170 |
| 308.15               | 152.4                  | -522.4  | 1.477 | 0.166 |

| Guanosine     |       |        |       |       |
|---------------|-------|--------|-------|-------|
| 298.15        | 245.1 | -858.2 | 2.587 | 0.170 |
| 303.15        | 209.4 | -753.6 | 2.130 | 0.166 |
| 308.15        | 163.5 | -565.4 | 1.477 | 0.161 |
| Uridine       |       |        |       |       |
| 298.15        | 259.0 | -948.3 | 2.973 | 0.163 |
| 303.15        | 220.3 | -800.1 | 2.333 | 0.165 |
| 308.15        | 178.1 | 668.2  | 2.002 | 0.159 |
| Cytidine      |       |        |       |       |
| 298.15        | 274.0 | -1034  | 3.365 | 0.159 |
| 303.15        | 233.9 | -907.4 | 2.569 | 0.161 |
| 308.15        | 192.0 | 761.6  | 2.262 | 0.159 |
| $w_1=0.004^b$ |       |        |       |       |
| Adenosine     |       |        |       |       |
| 298.15        | 240.6 | -830.2 | 2.824 | 0.168 |
| 303.15        | 208.2 | -755.1 | 2.258 | 0.163 |
| 308.15        | 161.5 | -587   | 1.865 | 0.155 |
| Guanosine     |       |        |       |       |
| 298.15        | 250.9 | -863   | 3.170 | 0.162 |
| 303.15        | 217.3 | -794.6 | 2.647 | 0.153 |
| 308.15        | 173.8 | -659.9 | 2.186 | 0.148 |
| Uridine       |       |        |       |       |
| 298.15        | 265.9 | -981.7 | 3.528 | 0.154 |
| 303.15        | 229.3 | -879.5 | 2.864 | 0.152 |
| 308.15        | 186.8 | -733.7 | 2.384 | 0.149 |
| Cytidine      |       |        |       |       |
| 298.15        | 280.3 | -1089  | 3.921 | 0.145 |
| 303.15        | 241.1 | -936   | 3.104 | 0.149 |
| 308.15        | 201   | -815.6 | 2.601 | 0.144 |
| $w_2=0.001^b$ |       |        |       |       |

| Adenosine      |       |        |       |       |
|----------------|-------|--------|-------|-------|
| 298.15         | 283.5 | -1178  | 3.800 | 0.141 |
| 303.15         | 250.6 | -1021  | 2.851 | 0.159 |
| 308.15         | 203.6 | -694.2 | 2.586 | 0.143 |
| Guanosine      |       |        |       |       |
| 298.15         | 294.4 | -1234  | 4.205 | 0.132 |
| 303.15         | 259.2 | -1084  | 3.108 | 0.154 |
| 308.15         | 215   | -782.1 | 2.798 | 0.139 |
| Uridine        |       |        |       |       |
| 298.15         | 261.5 | -1067  | 3.005 | 0.159 |
| 303.15         | 224.1 | -805.7 | 2.302 | 0.165 |
| 308.15         | 184.6 | -625.1 | 1.993 | 0.155 |
| Cytidine       |       |        |       |       |
| 298.15         | 273   | -1141  | 3.403 | 0.151 |
| 303.15         | 238   | -921.6 | 2.612 | 0.159 |
| 308.15         | 195.1 | -682.7 | 2.304 | 0.148 |
| $w_2=0.0025^b$ |       |        |       |       |
| Adenosine      |       |        |       |       |
| 298.15         | 295.7 | -1238  | 4.002 | 0.135 |
| 303.15         | 262.6 | -1091  | 3.109 | 0.147 |
| 308.15         | 213.8 | -754.2 | 2.706 | 0.140 |
| Guanosine      |       |        |       |       |
| 298.15         | 304.2 | -1267  | 4.402 | 0.126 |
| 303.15         | 270.7 | -1115  | 3.306 | 0.143 |
| 308.15         | 224.5 | -825.9 | 2.912 | 0.136 |
| Uridine        |       |        |       |       |
| 298.15         | 272.6 | -1109  | 3.348 | 0.149 |
| 303.15         | 235.5 | -919.7 | 2.602 | 0.158 |
| 308.15         | 194.7 | -657.8 | 2.200 | 0.151 |
| Cytidine       |       |        |       |       |



|               |       |        |       |       |
|---------------|-------|--------|-------|-------|
| 298.15        | 282.3 | -1188  | 3.601 | 0.145 |
| 303.15        | 250.7 | -1033  | 2.854 | 0.152 |
| 308.15        | 202.6 | -686.8 | 2.418 | 0.146 |
| $w_2=0.004^b$ |       |        |       |       |
| Adenosine     |       |        |       |       |
| 298.15        | 302.2 | -1224  | 4.302 | 0.133 |
| 303.15        | 270.6 | -1120  | 3.401 | 0.142 |
| 308.15        | 221.7 | -795.2 | 2.936 | 0.135 |
| Guanosine     |       |        |       |       |
| 298.15        | 314.4 | -1311  | 4.616 | 0.129 |
| 303.15        | 278.8 | -1143  | 3.708 | 0.136 |
| 308.15        | 231.4 | -868.2 | 3.207 | 0.128 |
| Uridine       |       |        |       |       |
| 298.15        | 275.4 | -1113  | 3.600 | 0.144 |
| 303.15        | 248.4 | -965   | 2.902 | 0.150 |
| 308.15        | 202.3 | -703.6 | 2.506 | 0.143 |
| Cytidine      |       |        |       |       |
| 298.15        | 284.6 | -1168  | 3.801 | 0.144 |
| 303.15        | 260   | -1069  | 3.111 | 0.147 |
| 308.15        | 209.3 | -715.2 | 2.710 | 0.139 |

<sup>a</sup> Standard uncertainties in temperature (T) = 0.01 K. <sup>b</sup>  $w_1$  and  $w_2$  are the molarity of  $\alpha$  and  $\beta$ -CD in aqueous mixture respectively.

**Table S10. Experimental values of refractive index ( $n_D$ ) and ultrasonic speed ( $u$ ) of RNA nucleosides in different molarity of aq. aqueous  $\alpha$  and  $\beta$ -cyclodextrin mixtures at 298.15 K<sup>a</sup>**

| Conc. (m)     | Adenosine         |        | Guanosine         |        | Uridine           |        | Cytidine          |        |
|---------------|-------------------|--------|-------------------|--------|-------------------|--------|-------------------|--------|
|               | $u/m\cdot s^{-1}$ | $n_D$  |
| $w_1=0.001^b$ |                   |        |                   |        |                   |        |                   |        |
| 0.0010        | 1502.2            | 1.3001 | 1505.3            | 1.3001 | 1500.1            | 1.3360 | 1504.0            | 1.3480 |

|                |        |        |        |        |        |        |        |        |
|----------------|--------|--------|--------|--------|--------|--------|--------|--------|
| 0.0025         | 1508.1 | 1.3120 | 1511.2 | 1.3010 | 1511.1 | 1.3385 | 1522.2 | 1.3493 |
| 0.0040         | 1515.0 | 1.3250 | 1519.0 | 1.3125 | 1518.0 | 1.3402 | 1535.2 | 1.3502 |
| 0.0055         | 1524.2 | 1.3355 | 1527.2 | 1.3410 | 1535.1 | 1.3420 | 1549.1 | 1.3512 |
| 0.0070         | 1533.1 | 1.3460 | 1536.3 | 1.3550 | 1541.3 | 1.3430 | 1567.3 | 1.3521 |
| 0.0085         | 1542.1 | 1.3550 | 1545.1 | 1.3590 | 1559.3 | 1.3440 | 1580.2 | 1.3530 |
| $w_1=0.0025^b$ |        |        |        |        |        |        |        |        |
| 0.0010         | 1510.2 | 1.3075 | 1513.0 | 1.3075 | 1499.1 | 1.3420 | 1502.0 | 1.3552 |
| 0.0025         | 1512.2 | 1.3213 | 1515.0 | 1.3110 | 1510.1 | 1.3433 | 1518.1 | 1.3554 |
| 0.0040         | 1520.3 | 1.3350 | 1528.1 | 1.3300 | 1522.1 | 1.3443 | 1531.1 | 1.3555 |
| 0.0055         | 1528.3 | 1.3550 | 1533.1 | 1.3620 | 1565.3 | 1.3452 | 1559.2 | 1.3557 |
| 0.0070         | 1537.3 | 1.3600 | 1537.2 | 1.3700 | 1570.2 | 1.3460 | 1571.2 | 1.3558 |
| 0.0085         | 1548.2 | 1.3690 | 1540.1 | 1.3790 | 1582.0 | 1.3470 | 1585.3 | 1.3560 |
| $w_1=0.004^b$  |        |        |        |        |        |        |        |        |
| 0.0010         | 1509.2 | 1.3171 | 1520.2 | 1.3171 | 1507.0 | 1.3485 | 1510.2 | 1.3640 |
| 0.0025         | 1518.2 | 1.3257 | 1521.3 | 1.3172 | 1518.0 | 1.3487 | 1532.2 | 1.3642 |
| 0.0040         | 1528.1 | 1.3390 | 1525.1 | 1.3300 | 1529.1 | 1.3489 | 1548.1 | 1.3644 |
| 0.0055         | 1537.1 | 1.3700 | 1531.1 | 1.3700 | 1576.1 | 1.3491 | 1559.1 | 1.3646 |
| 0.0070         | 1545.3 | 1.3780 | 1535.2 | 1.3855 | 1585.2 | 1.3493 | 1573.3 | 1.3648 |
| 0.0085         | 1555.0 | 1.3782 | 1541.3 | 1.3885 | 1594.3 | 1.3495 | 1598.2 | 1.3650 |
| $w_2=0.001^b$  |        |        |        |        |        |        |        |        |
| 0.0010         | 1520.0 | 1.3513 | 1523.2 | 1.3531 | 1510.2 | 1.3278 | 1512.1 | 1.3323 |
| 0.0025         | 1530.0 | 1.3513 | 1532.3 | 1.3531 | 1520.1 | 1.3279 | 1519.3 | 1.3325 |
| 0.0040         | 1541.2 | 1.3514 | 1544.1 | 1.3532 | 1526.2 | 1.3280 | 1521.1 | 1.3327 |
| 0.0055         | 1552.3 | 1.3515 | 1557.4 | 1.3532 | 1530.1 | 1.3281 | 1524.0 | 1.3329 |
| 0.0070         | 1563.1 | 1.3516 | 1568.2 | 1.3533 | 1535.0 | 1.3282 | 1527.2 | 1.3331 |
| 0.0085         | 1575.1 | 1.3517 | 1582.0 | 1.3534 | 1540.0 | 1.3283 | 1530.1 | 1.3333 |
| $w_2=0.0025^b$ |        |        |        |        |        |        |        |        |
| 0.0010         | 1524.2 | 1.3582 | 1526.1 | 1.3600 | 1523.0 | 1.3330 | 1525.2 | 1.3405 |
| 0.0025         | 1531.1 | 1.3590 | 1536.2 | 1.3602 | 1525.2 | 1.3334 | 1534.1 | 1.3407 |
| 0.0040         | 1543.1 | 1.3596 | 1547.2 | 1.3603 | 1524.1 | 1.3338 | 1535.2 | 1.3409 |

|               |        |        |        |        |        |        |        |        |
|---------------|--------|--------|--------|--------|--------|--------|--------|--------|
| 0.0055        | 1555.0 | 1.3600 | 1559.2 | 1.3605 | 1530.3 | 1.3341 | 1537.0 | 1.3411 |
| 0.0070        | 1566.0 | 1.3604 | 1572.3 | 1.3606 | 1532.2 | 1.3345 | 1538.0 | 1.3413 |
| 0.0085        | 1577.3 | 1.3608 | 1586.1 | 1.3608 | 1533.2 | 1.3348 | 1540.1 | 1.3415 |
| $w_2=0.004^b$ |        |        |        |        |        |        |        |        |
| 0.0010        | 1528.2 | 1.3630 | 1530.2 | 1.3670 | 1527.1 | 1.3360 | 1532.2 | 1.3430 |
| 0.0025        | 1537.3 | 1.3640 | 1540.2 | 1.3679 | 1534.2 | 1.3361 | 1524.3 | 1.3431 |
| 0.0040        | 1548.3 | 1.3648 | 1551.3 | 1.3686 | 1536.1 | 1.3362 | 1535.2 | 1.3432 |
| 0.0055        | 1559.2 | 1.3655 | 1563.3 | 1.3691 | 1542.3 | 1.3363 | 1545.3 | 1.3433 |
| 0.0070        | 1570.3 | 1.3660 | 1576.2 | 1.3695 | 1545.3 | 1.3364 | 1556.2 | 1.3434 |
| 0.0085        | 1583.2 | 1.3665 | 1591.1 | 1.3700 | 1550.2 | 1.3365 | 1548.2 | 1.3435 |

<sup>a</sup> Standard uncertainties in temperature (T) = 0.01 K. <sup>b</sup>  $w_1$  and  $w_2$  are the molarity of  $\alpha$  and  $\beta$ -CD in aqueous mixture respectively.

**Table S11. Limiting molar refractions ( $R_M^0$ ) and limiting molar adiabatic compressibilities ( $\phi_K^0$ ) of RNA nucleosides in different molarity of aq.  $\alpha$  and  $\beta$ -cyclodextrin mixtures at 298.15 K<sup>a</sup>**

| aq. solvent<br>mixture | $R_M^0/\text{m}^3\cdot\text{mol}^{-1}$ |           |         |          | $\phi_K^0/\text{m}^3\cdot\text{mol}^{-1}\cdot\text{Pa}^{-1}$ |           |         |          |
|------------------------|----------------------------------------|-----------|---------|----------|--------------------------------------------------------------|-----------|---------|----------|
|                        | Adenosine                              | Guanosine | Uridine | Cytidine | Adenosine                                                    | Guanosine | Uridine | Cytidine |
| $w_1=0.001^b$          | 45.38                                  | 45.79     | 50.22   | 51.84    | 1.02                                                         | 1.08      | 1.18    | 1.23     |
| $w_1=0.0025^b$         | 45.87                                  | 46.14     | 51.22   | 53.10    | 1.05                                                         | 1.09      | 1.21    | 1.26     |
| $w_1=0.004^b$          | 46.31                                  | 46.79     | 52.36   | 54.24    | 1.08                                                         | 1.10      | 1.23    | 1.27     |
| $w_2=0.001^b$          | 57.83                                  | 61.58     | 49.62   | 49.99    | 1.26                                                         | 1.31      | 1.16    | 1.20     |
| $w_2=0.0025^b$         | 58.66                                  | 62.60     | 50.20   | 51.09    | 1.308                                                        | 1.34      | 1.18    | 1.22     |
| $w_2=0.004^b$          | 59.26                                  | 63.48     | 50.69   | 51.44    | 1.328                                                        | 1.38      | 1.19    | 1.24     |

<sup>a</sup> Standard uncertainties in temperature (T) = 0.01 K. <sup>b</sup>  $w_1$  and  $w_2$  are the molarity of  $\alpha$  and  $\beta$ -CD in aqueous mixture respectively.

**Table S12 Data for the Benesi-Hildebrand double reciprocal plot performed by UV-Vis spectroscopy for aqueous uridine- $\alpha$ -CD system:**

| Temp<br>/K <sup>a</sup> | [U]<br>/ $\mu\text{m}$ | [ $\alpha$ -CD]<br>/ $\mu\text{m}$ | A <sub>0</sub> | A     | $\Delta A$ | 1/[ $\alpha$ -CD]<br>/ $\text{m}^{-1}$ | 1/ $\Delta A$ | Intercept | Slope    | K <sub>a</sub><br>/ $\text{m}^{-1}$ |
|-------------------------|------------------------|------------------------------------|----------------|-------|------------|----------------------------------------|---------------|-----------|----------|-------------------------------------|
| 298.15                  | 50                     | 30                                 | 0.398          | 0.431 | 0.033      | 33333                                  | 30.3          | 1.221939  | 0.000875 | 1396.98                             |
|                         | 50                     | 40                                 |                | 0.441 | 0.043      | 25000                                  | 23.3          |           |          |                                     |
|                         | 50                     | 50                                 |                | 0.452 | 0.054      | 20000                                  | 18.5          |           |          |                                     |
|                         | 50                     | 60                                 |                | 0.460 | 0.062      | 16667                                  | 16.1          |           |          |                                     |
|                         | 50                     | 70                                 |                | 0.472 | 0.074      | 14286                                  | 13.5          |           |          |                                     |
| 303.15                  | 50                     | 30                                 | 0.398          | 0.430 | 0.032      | 33333                                  | 31.3          | 1.114534  | 0.000917 | 1215.68                             |
|                         | 50                     | 40                                 |                | 0.438 | 0.040      | 25000                                  | 25.0          |           |          |                                     |
|                         | 50                     | 50                                 |                | 0.451 | 0.053      | 20000                                  | 18.9          |           |          |                                     |
|                         | 50                     | 60                                 |                | 0.458 | 0.060      | 16667                                  | 16.7          |           |          |                                     |
|                         | 50                     | 70                                 |                | 0.470 | 0.072      | 14286                                  | 13.9          |           |          |                                     |
| 308.15                  | 50                     | 30                                 | 0.398          | 0.429 | 0.031      | 33333                                  | 32.3          | 1.000263  | 0.000952 | 1050.81                             |
|                         | 50                     | 40                                 |                | 0.437 | 0.039      | 25000                                  | 25.6          |           |          |                                     |
|                         | 50                     | 50                                 |                | 0.448 | 0.050      | 20000                                  | 20.0          |           |          |                                     |
|                         | 50                     | 60                                 |                | 0.457 | 0.059      | 16667                                  | 16.9          |           |          |                                     |
|                         | 50                     | 70                                 |                | 0.469 | 0.071      | 14286                                  | 14.2          |           |          |                                     |

<sup>a</sup> Standard uncertainties in temperature (T) = 0.01 K.

**Table S13 Data for the Benesi-Hildebrand double reciprocal plot performed by UV-Vis spectroscopy for aqueous cytidine- $\alpha$ -CD system:**

| Temp<br>/K <sup>a</sup> | [C]<br>/ $\mu\text{m}$ | [ $\alpha$ -CD]<br>/ $\mu\text{m}$ | A <sub>0</sub> | A     | $\Delta A$ | 1/[ $\alpha$ -CD]<br>/ $\text{m}^{-1}$ | 1/ $\Delta A$ | Intercept | Slope    | K <sub>a</sub><br>/ $\text{m}^{-1}$ |
|-------------------------|------------------------|------------------------------------|----------------|-------|------------|----------------------------------------|---------------|-----------|----------|-------------------------------------|
| 298.15                  | 50                     | 30                                 | 0.372          | 0.399 | 0.027      | 33333                                  | 37.0          | 1.586949  | 0.001068 | 1486.60                             |
|                         | 50                     | 40                                 |                | 0.407 | 0.035      | 25000                                  | 28.6          |           |          |                                     |
|                         | 50                     | 50                                 |                | 0.416 | 0.044      | 20000                                  | 22.7          |           |          |                                     |
|                         | 50                     | 60                                 |                | 0.423 | 0.051      | 16667                                  | 19.6          |           |          |                                     |
|                         | 50                     | 70                                 |                | 0.432 | 0.060      | 14286                                  | 16.7          |           |          |                                     |
| 303.15                  | 50                     | 30                                 | 0.372          | 0.398 | 0.026      | 33333                                  | 38.5          | 1.471382  | 0.001125 | 1307.43                             |
|                         | 50                     | 40                                 |                | 0.405 | 0.033      | 25000                                  | 30.3          |           |          |                                     |

|        |    |    |       |       |       |       |      |          |          |         |
|--------|----|----|-------|-------|-------|-------|------|----------|----------|---------|
|        | 50 | 50 |       | 0.413 | 0.041 | 20000 | 24.4 |          |          |         |
|        | 50 | 60 |       | 0.421 | 0.049 | 16667 | 20.3 |          |          |         |
|        | 50 | 70 |       | 0.431 | 0.059 | 14286 | 16.9 |          |          |         |
|        | 50 | 30 |       | 0.397 | 0.025 | 33333 | 40.0 |          |          |         |
|        | 50 | 40 |       | 0.403 | 0.031 | 25000 | 32.3 |          |          |         |
| 308.15 | 50 | 50 | 0.372 | 0.410 | 0.038 | 20000 | 26.3 | 1.320772 | 0.001190 | 1109.89 |
|        | 50 | 60 |       | 0.420 | 0.048 | 16667 | 20.8 |          |          |         |
|        | 50 | 70 |       | 0.430 | 0.058 | 14286 | 17.2 |          |          |         |

<sup>a</sup> Standard uncertainties in temperature (T) = 0.01 K.

**Table S14 Data for the Benesi-Hildebrand double reciprocal plot performed by UV-Vis spectroscopy for aqueous adenosine- $\beta$ -CD system:**

| Temp<br>/K <sup>a</sup> | [Ad]<br>/ $\mu$ m | [ $\beta$ -CD]<br>/ $\mu$ m | A <sub>0</sub> | A     | $\Delta A$ | 1/[ $\beta$ -CD]<br>/m <sup>-1</sup> | 1/ $\Delta A$ | Intercept | Slope    | K <sub>a</sub><br>/m <sup>-1</sup> |
|-------------------------|-------------------|-----------------------------|----------------|-------|------------|--------------------------------------|---------------|-----------|----------|------------------------------------|
|                         | 50                | 30                          |                | 0.426 | 0.029      | 33333                                | 34.5          |           |          |                                    |
|                         | 50                | 40                          |                | 0.435 | 0.038      | 25000                                | 26.3          |           |          |                                    |
| 298.15                  | 50                | 50                          | 0.397          | 0.441 | 0.044      | 20000                                | 22.7          | 1.568811  | 0.000995 | 1577.33                            |
|                         | 50                | 60                          |                | 0.454 | 0.057      | 16667                                | 17.5          |           |          |                                    |
|                         | 50                | 70                          |                | 0.462 | 0.065      | 14286                                | 16.7          |           |          |                                    |
|                         | 50                | 30                          |                | 0.424 | 0.027      | 33333                                | 37.0          |           |          |                                    |
|                         | 50                | 40                          |                | 0.432 | 0.035      | 25000                                | 28.6          |           |          |                                    |
| 303.15                  | 50                | 50                          | 0.397          | 0.438 | 0.041      | 20000                                | 24.4          | 1.536412  | 0.001077 | 1427.23                            |
|                         | 50                | 60                          |                | 0.450 | 0.053      | 16667                                | 18.8          |           |          |                                    |
|                         | 50                | 70                          |                | 0.458 | 0.061      | 14286                                | 16.5          |           |          |                                    |
|                         | 50                | 30                          |                | 0.422 | 0.025      | 33333                                | 40.0          |           |          |                                    |
|                         | 50                | 40                          |                | 0.429 | 0.032      | 25000                                | 31.3          |           |          |                                    |
| 308.15                  | 50                | 50                          | 0.397          | 0.435 | 0.038      | 20000                                | 26.3          | 1.413185  | 0.001176 | 1202.20                            |
|                         | 50                | 60                          |                | 0.446 | 0.049      | 16667                                | 20.4          |           |          |                                    |
|                         | 50                | 70                          |                | 0.454 | 0.057      | 14286                                | 17.6          |           |          |                                    |

<sup>a</sup> Standard uncertainties in temperature (T) = 0.01 K.

**Table S15 Data for the Benesi-Hildebrand double reciprocal plot performed by UV-Vis spectroscopy for aqueous guanosine- $\beta$ -CD system:**

| Temp<br>/K <sup>a</sup> | [G]<br>/ $\mu\text{m}$ | $[\beta\text{-CD}]$<br>/ $\mu\text{m}$ | A <sub>0</sub> | A     | $\Delta A$ | $1/[\beta\text{-CD}]$<br>/ $\text{m}^{-1}$ | $1/\Delta A$ | Intercept | Slope    | K <sub>a</sub><br>/ $\text{m}^{-1}$ |
|-------------------------|------------------------|----------------------------------------|----------------|-------|------------|--------------------------------------------|--------------|-----------|----------|-------------------------------------|
| 298.15                  | 50                     | 30                                     | 0.432          | 0.451 | 0.019      | 33333                                      | 52.6         | 2.557830  | 0.001506 | 1697.98                             |
|                         | 50                     | 40                                     |                | 0.457 | 0.025      | 25000                                      | 40.0         |           |          |                                     |
|                         | 50                     | 50                                     |                | 0.462 | 0.030      | 20000                                      | 33.3         |           |          |                                     |
|                         | 50                     | 60                                     |                | 0.467 | 0.035      | 16667                                      | 28.2         |           |          |                                     |
|                         | 50                     | 70                                     |                | 0.475 | 0.043      | 14286                                      | 23.3         |           |          |                                     |
| 303.15                  | 50                     | 30                                     | 0.432          | 0.449 | 0.017      | 33333                                      | 60.6         | 2.600207  | 0.001765 | 1473.12                             |
|                         | 50                     | 40                                     |                | 0.453 | 0.021      | 25000                                      | 47.6         |           |          |                                     |
|                         | 50                     | 50                                     |                | 0.458 | 0.026      | 20000                                      | 38.5         |           |          |                                     |
|                         | 50                     | 60                                     |                | 0.462 | 0.030      | 16667                                      | 33.3         |           |          |                                     |
|                         | 50                     | 70                                     |                | 0.471 | 0.039      | 14286                                      | 25.9         |           |          |                                     |
| 308.15                  | 50                     | 30                                     | 0.432          | 0.446 | 0.014      | 33333                                      | 69.9         | 2.664740  | 0.002058 | 1295.07                             |
|                         | 50                     | 40                                     |                | 0.450 | 0.018      | 25000                                      | 55.6         |           |          |                                     |
|                         | 50                     | 50                                     |                | 0.454 | 0.022      | 20000                                      | 45.5         |           |          |                                     |
|                         | 50                     | 60                                     |                | 0.459 | 0.027      | 16667                                      | 37.1         |           |          |                                     |
|                         | 50                     | 70                                     |                | 0.465 | 0.033      | 14286                                      | 30.2         |           |          |                                     |

<sup>a</sup> Standard uncertainties in temperature (T) = 0.01 K.

**Table S16 Data for the Benesi-Hildebrand double reciprocal plot performed by UV-Vis spectroscopy for aqueous uridine- $\beta$ -CD system:**

| Temp<br>/K <sup>a</sup> | [U]<br>/ $\mu\text{m}$ | $[\beta\text{-CD}]$<br>/ $\mu\text{m}$ | A <sub>0</sub> | A     | $\Delta A$ | $1/[\beta\text{-CD}]$<br>/ $\text{m}^{-1}$ | $1/\Delta A$ | Intercept | Slope    | K <sub>a</sub><br>/ $\text{m}^{-1}$ |
|-------------------------|------------------------|----------------------------------------|----------------|-------|------------|--------------------------------------------|--------------|-----------|----------|-------------------------------------|
| 298.15                  | 50                     | 30                                     | 0.398          | 0.421 | 0.023      | 33333                                      | 42.6         | 1.294486  | 0.001248 | 1037.50                             |
|                         | 50                     | 40                                     |                | 0.428 | 0.030      | 25000                                      | 33.1         |           |          |                                     |
|                         | 50                     | 50                                     |                | 0.436 | 0.038      | 20000                                      | 26.1         |           |          |                                     |
|                         | 50                     | 60                                     |                | 0.443 | 0.045      | 16667                                      | 22.2         |           |          |                                     |
|                         | 50                     | 70                                     |                | 0.451 | 0.053      | 14286                                      | 18.8         |           |          |                                     |
| 303.15                  | 50                     | 30                                     | 0.398          | 0.419 | 0.021      | 33333                                      | 47.6         | 1.258348  | 0.001375 | 915.49                              |
|                         | 50                     | 40                                     |                | 0.427 | 0.029      | 25000                                      | 34.2         |           |          |                                     |
|                         | 50                     | 50                                     |                | 0.432 | 0.034      | 20000                                      | 29.4         |           |          |                                     |

|        |    |    |       |       |       |       |      |          |          |        |
|--------|----|----|-------|-------|-------|-------|------|----------|----------|--------|
|        | 50 | 60 |       | 0.439 | 0.041 | 16667 | 24.4 |          |          |        |
|        | 50 | 70 |       | 0.446 | 0.048 | 14286 | 20.8 |          |          |        |
|        | 50 | 30 |       | 0.417 | 0.019 | 33333 | 52.6 |          |          |        |
|        | 50 | 40 |       | 0.423 | 0.025 | 25000 | 40.0 |          |          |        |
| 308.15 | 50 | 50 | 0.398 | 0.429 | 0.031 | 20000 | 32.0 | 1.218668 | 0.001544 | 789.09 |
|        | 50 | 60 |       | 0.435 | 0.037 | 16667 | 27.0 |          |          |        |
|        | 50 | 70 |       | 0.441 | 0.043 | 14286 | 23.2 |          |          |        |

<sup>a</sup> Standard uncertainties in temperature (T) = 0.01 K.

**Table S17 Data for the Benesi-Hildebrand double reciprocal plot performed by UV-Vis spectroscopy for aqueous cytidine- $\beta$ -CD system:**

| Temp<br>/K <sup>a</sup> | [C]<br>/ $\mu$ m | [ $\beta$ -CD]<br>/ $\mu$ m | A <sub>0</sub> | A     | $\Delta A$ | 1/[ $\beta$ -CD]<br>/ $m^{-1}$ | 1/ $\Delta A$ | Intercept | Slope    | K <sub>a</sub><br>/ $m^{-1}$ |
|-------------------------|------------------|-----------------------------|----------------|-------|------------|--------------------------------|---------------|-----------|----------|------------------------------|
|                         | 50               | 30                          |                | 0.389 | 0.017      | 33333                          | 60.6          |           |          |                              |
|                         | 50               | 40                          |                | 0.394 | 0.022      | 25000                          | 45.5          |           |          |                              |
| 298.15                  | 50               | 50                          | 0.372          | 0.399 | 0.027      | 20000                          | 37.2          | 1.939517  | 0.001755 | 1104.95                      |
|                         | 50               | 60                          |                | 0.404 | 0.032      | 16667                          | 31.3          |           |          |                              |
|                         | 50               | 70                          |                | 0.409 | 0.037      | 14286                          | 27.0          |           |          |                              |
|                         | 50               | 30                          |                | 0.386 | 0.014      | 33333                          | 71.5          |           |          |                              |
|                         | 50               | 40                          |                | 0.391 | 0.019      | 25000                          | 52.6          |           |          |                              |
| 303.15                  | 50               | 50                          | 0.372          | 0.395 | 0.023      | 20000                          | 43.5          | 2.056677  | 0.002067 | 994.91                       |
|                         | 50               | 60                          |                | 0.399 | 0.027      | 16667                          | 37.2          |           |          |                              |
|                         | 50               | 70                          |                | 0.404 | 0.032      | 14286                          | 31.4          |           |          |                              |
|                         | 50               | 30                          |                | 0.384 | 0.012      | 33333                          | 83.3          |           |          |                              |
|                         | 50               | 40                          |                | 0.388 | 0.016      | 25000                          | 62.5          |           |          |                              |
| 308.15                  | 50               | 50                          | 0.372          | 0.392 | 0.020      | 20000                          | 50.0          | 2.061330  | 0.002426 | 849.61                       |
|                         | 50               | 60                          |                | 0.396 | 0.024      | 16667                          | 41.7          |           |          |                              |
|                         | 50               | 70                          |                | 0.398 | 0.026      | 14286                          | 38.0          |           |          |                              |

<sup>a</sup> Standard uncertainties in temperature (T) = 0.01 K.

**Table S18 Data of the van't Hoff equation for the calculation of thermodynamic parameters  $\Delta H^\circ$ ,  $\Delta S^\circ$  and  $\Delta G^\circ$  of different nucleoside-cyclodextrin inclusion complexes:**

|          | Temp<br>/K <sup>a</sup> | K <sub>a</sub><br>/M <sup>-1</sup> | 1/T     | lnK <sub>a</sub> | Intercept | Slope    | ΔH°<br>/kJ mol <sup>-1</sup> | ΔS°<br>/J mol <sup>-1</sup> K <sup>-1</sup> | ΔG°<br>/kJ mol <sup>-1</sup> |
|----------|-------------------------|------------------------------------|---------|------------------|-----------|----------|------------------------------|---------------------------------------------|------------------------------|
| U + α-CD | 298.15                  | 1396.98                            | 0.00335 | 3.14519          |           |          |                              |                                             |                              |
|          | 303.15                  | 1215.68                            | 0.00330 | 3.08482          | -0.664    | 1,135.94 | -9.44                        | -5.52                                       | -7.80                        |
|          | 308.15                  | 1050.81                            | 0.00325 | 3.02152          |           |          |                              |                                             |                              |
| C + α-CD | 298.15                  | 1486.60                            | 0.00335 | 3.17220          |           |          |                              |                                             |                              |
|          | 303.15                  | 1307.43                            | 0.00330 | 3.11642          | -0.7328   | 1,165.10 | -9.69                        | -6.09                                       | -7.87                        |
|          | 308.15                  | 1109.89                            | 0.00325 | 3.04528          |           |          |                              |                                             |                              |
| A + β-CD | 298.15                  | 1577.33                            | 0.00335 | 3.197922         |           |          |                              |                                             |                              |
|          | 303.15                  | 1427.23                            | 0.00330 | 3.154494         | -0.4256   | 1,081.96 | -9.00                        | -3.54                                       | -7.94                        |
|          | 308.15                  | 1202.20                            | 0.00325 | 3.079976         |           |          |                              |                                             |                              |
| G + β-CD | 298.15                  | 1697.98                            | 0.00335 | 3.229931         |           |          |                              |                                             |                              |
|          | 303.15                  | 1473.12                            | 0.00330 | 3.168239         | -0.3963   | 1,081.00 | -8.99                        | -3.30                                       | -8.01                        |
|          | 308.15                  | 1295.07                            | 0.00325 | 3.112294         |           |          |                              |                                             |                              |
| U + β-CD | 298.15                  | 1037.50                            | 0.00335 | 3.015987         |           |          |                              |                                             |                              |
|          | 303.15                  | 915.49                             | 0.00330 | 2.961656         | -0.6427   | 1,091.4  | -9.07                        | -5.34                                       | -7.48                        |
|          | 308.15                  | 789.09                             | 0.00325 | 2.897126         |           |          |                              |                                             |                              |
| C + β-CD | 298.15                  | 1104.95                            | 0.00335 | 3.043342         |           |          |                              |                                             |                              |
|          | 303.15                  | 994.91                             | 0.00330 | 2.997784         | -0.465    | 1,047.2  | -8.71                        | -3.87                                       | -7.55                        |
|          | 308.15                  | 849.61                             | 0.00325 | 2.929221         |           |          |                              |                                             |                              |

<sup>a</sup> Standard uncertainties in temperature (T) = 0.01 K.



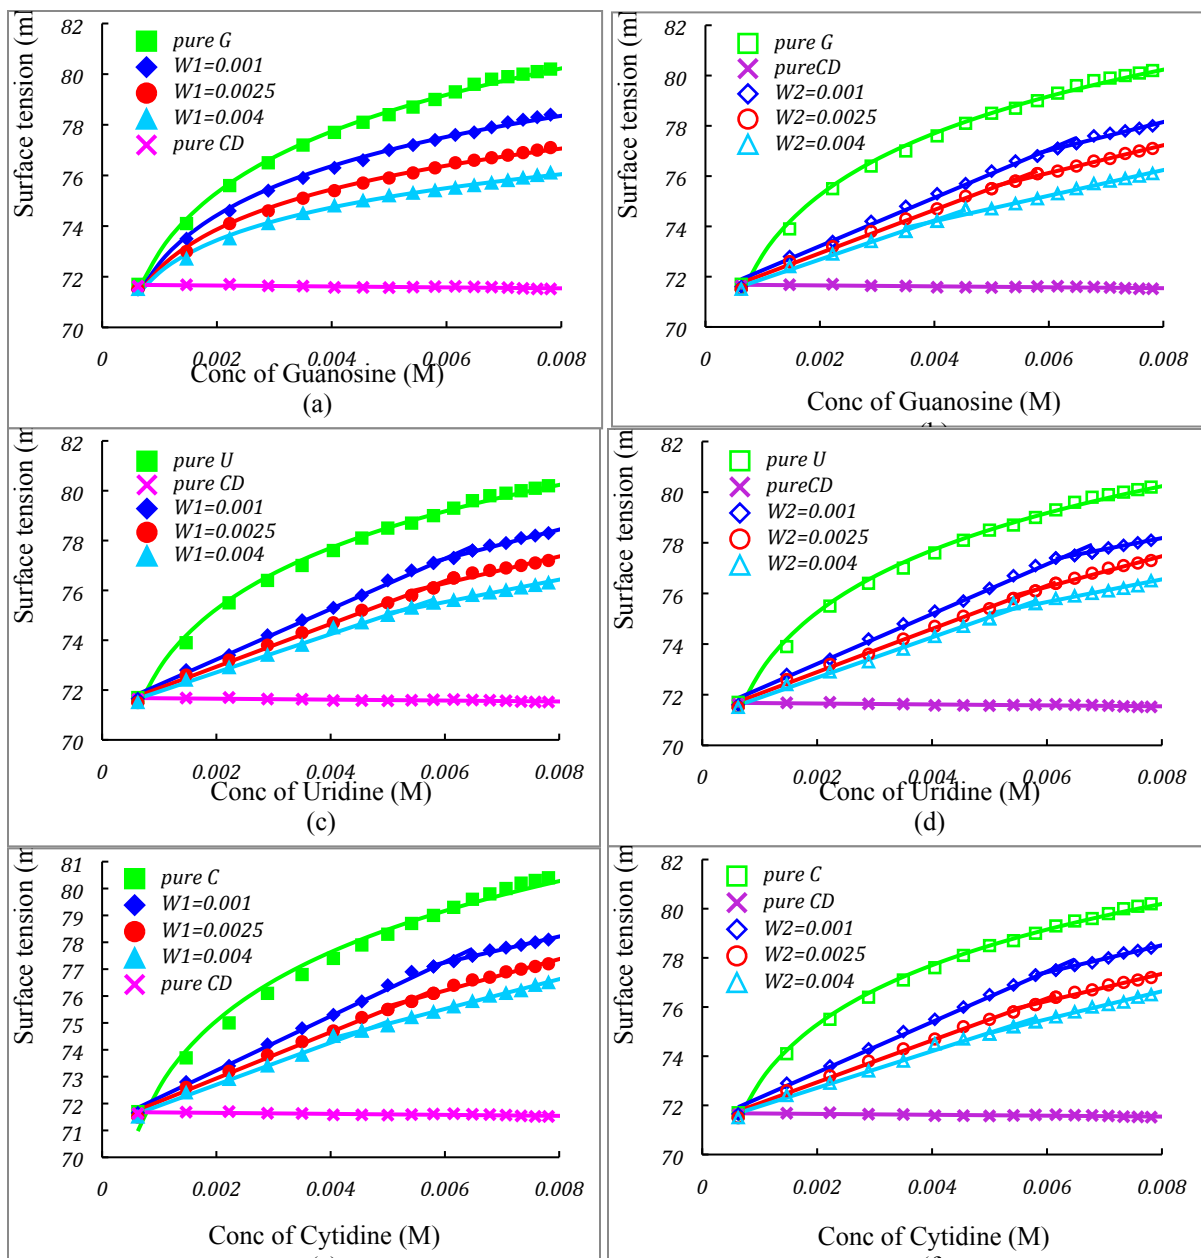

**Fig. S1** Plot of surface tension with increasing concentration of nucleosides in different molarity of  $\alpha$ -cyclodextrin ( $w_1$ ) and  $\beta$ -cyclodextrin ( $w_2$ ) respectively at 298.15 K.

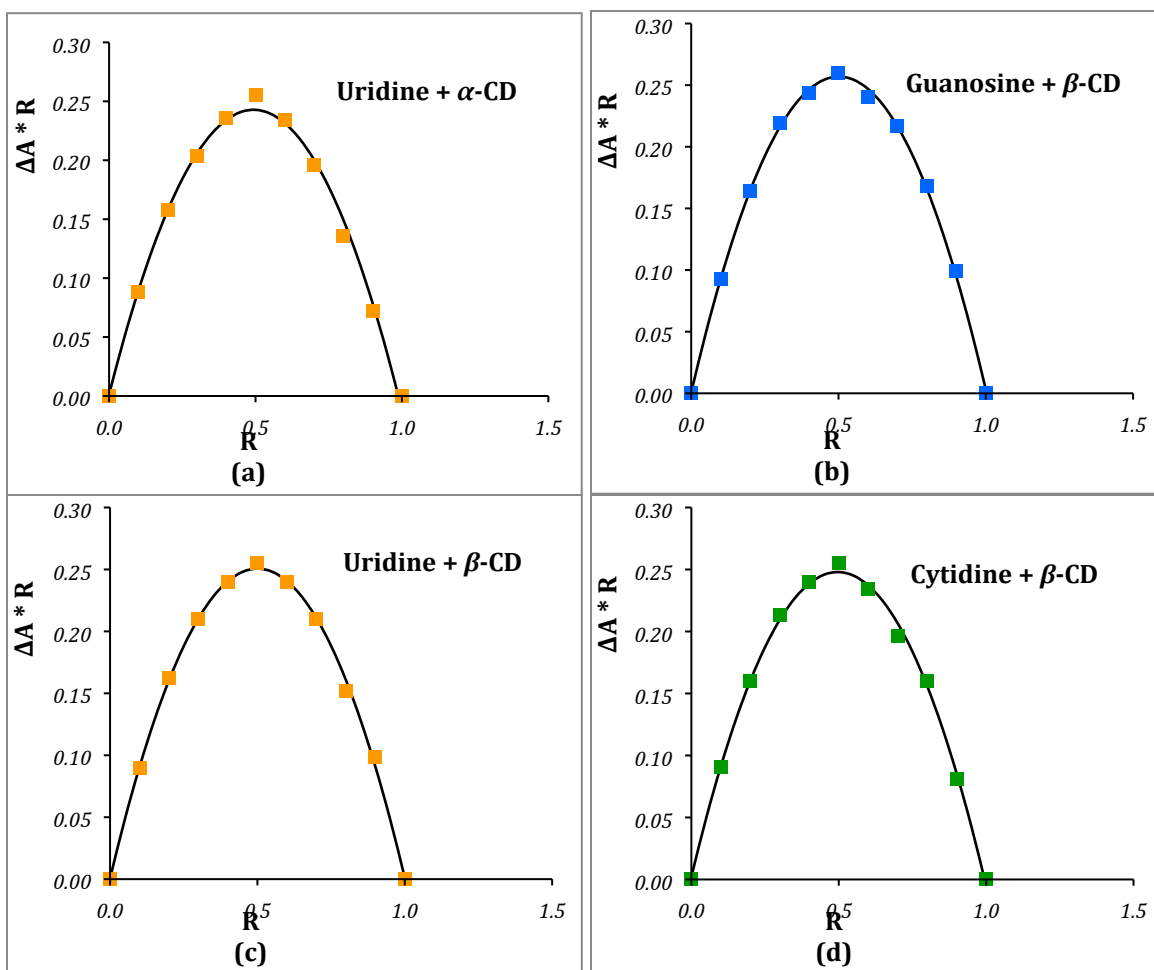

**Fig. S2** Job plot of different nucleoside-cyclodextrin systems at  $\lambda_{\max}$  (nm) = 261 for uridine, 253 for guanosine and 270 for cytidine at 298.15 K.  $R = [\text{nucleoside}]/([\text{nucleoside}] + [\text{CD}])$ ,  $\Delta A$  = absorbance difference of the nucleoside without and with cyclodextrin.

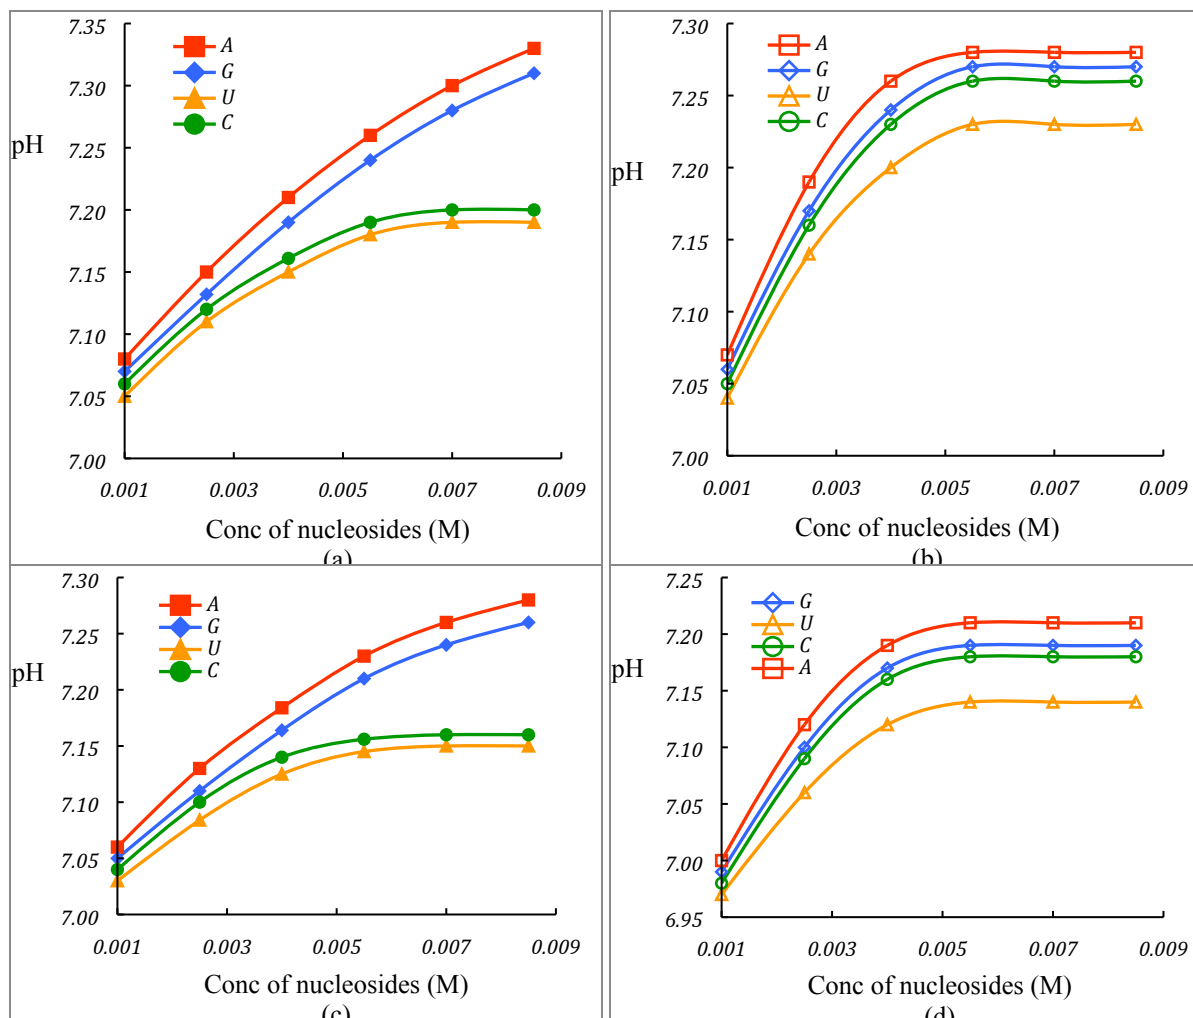

**Fig. S3** Plot of pH with increasing concentration of nucleosides. (a) molarity ( $w_1$ ) of  $\alpha$ -cyclodextrine = 0.0025, (b) molarity ( $w_2$ ) of  $\beta$ -cyclodextrine = 0.0025, (c) molarity ( $w_1$ ) of  $\alpha$ -cyclodextrine = 0.004 and (d) molarity ( $w_2$ ) of  $\beta$ -cyclodextrine = 0.004 at 298.15 K.

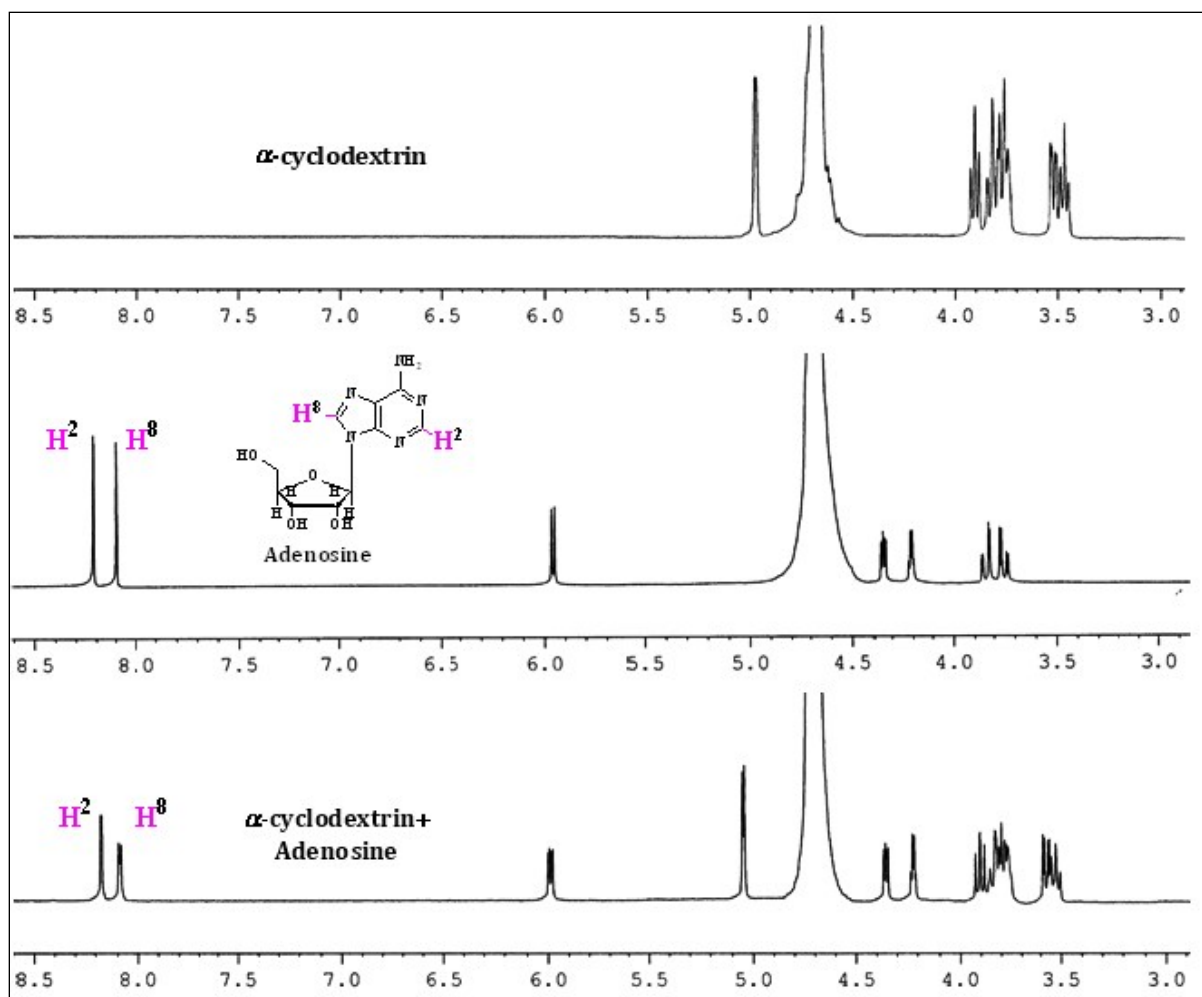

**Fig. S4**  $^1\text{H}$  NMR spectra of  $\alpha$ -CD, adenosine and 1:1 molar ratio of  $\alpha$ -CD & adenosine in  $\text{D}_2\text{O}$  at 298.15K.

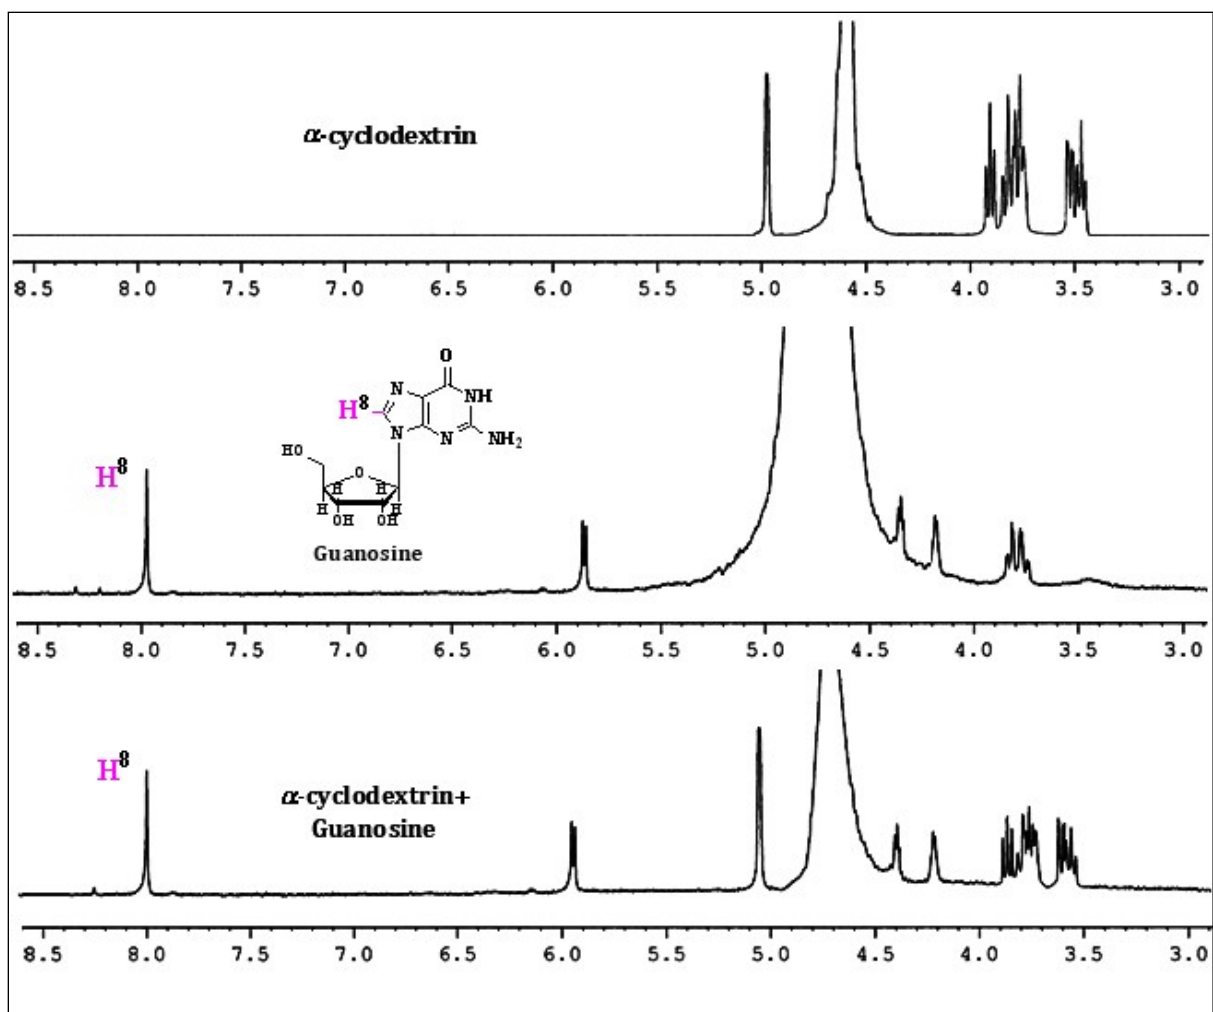

**Fig. S5**  $^1\text{H}$  NMR spectra of  $\alpha$ -CD, guanosine and 1:1 molar ratio of  $\alpha$ -CD & guanosine in  $\text{D}_2\text{O}$  at 298.15K.

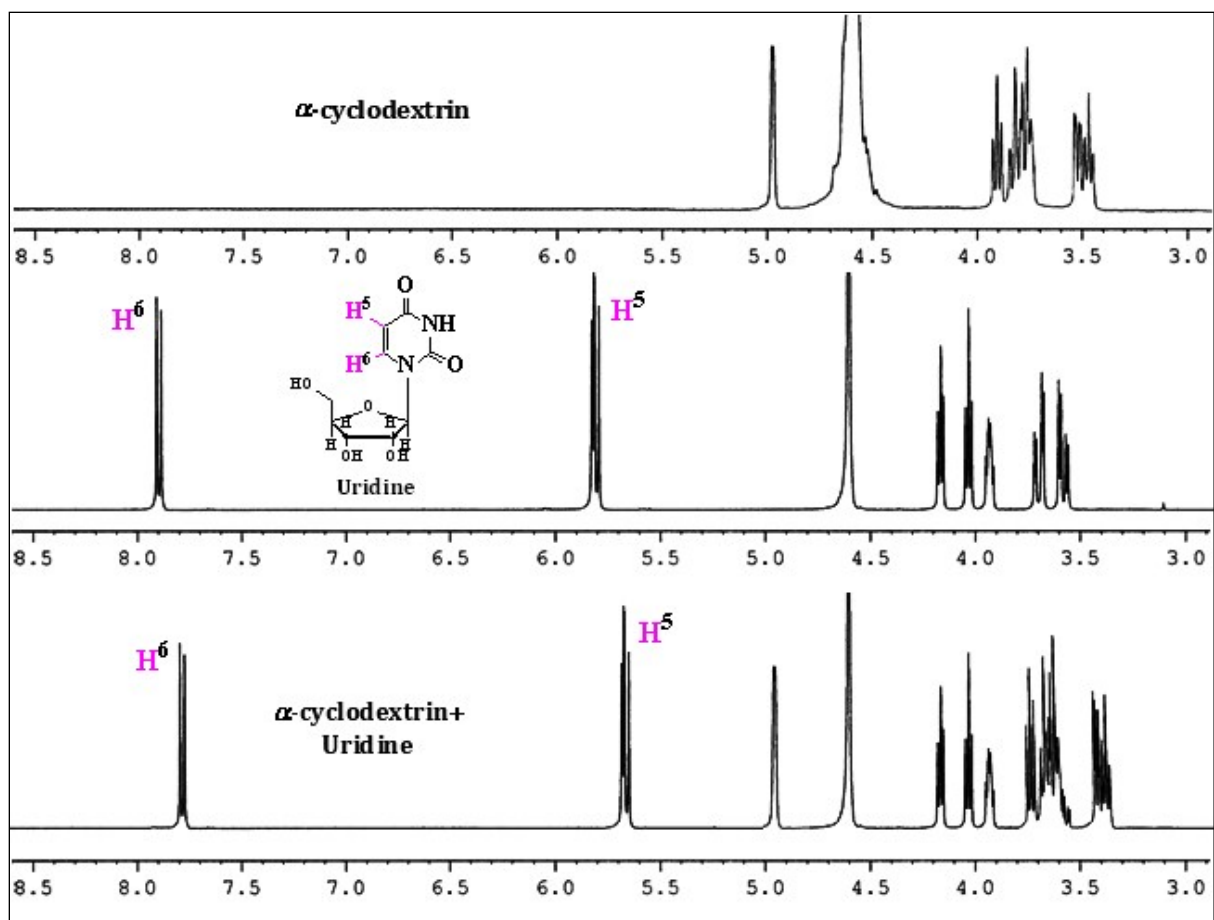

**Fig. S6**  $^1\text{H}$  NMR spectra of  $\alpha$ -CD, uridine and 1:1 molar ratio of  $\alpha$ -CD & uridine in  $\text{D}_2\text{O}$  at 298.15K.

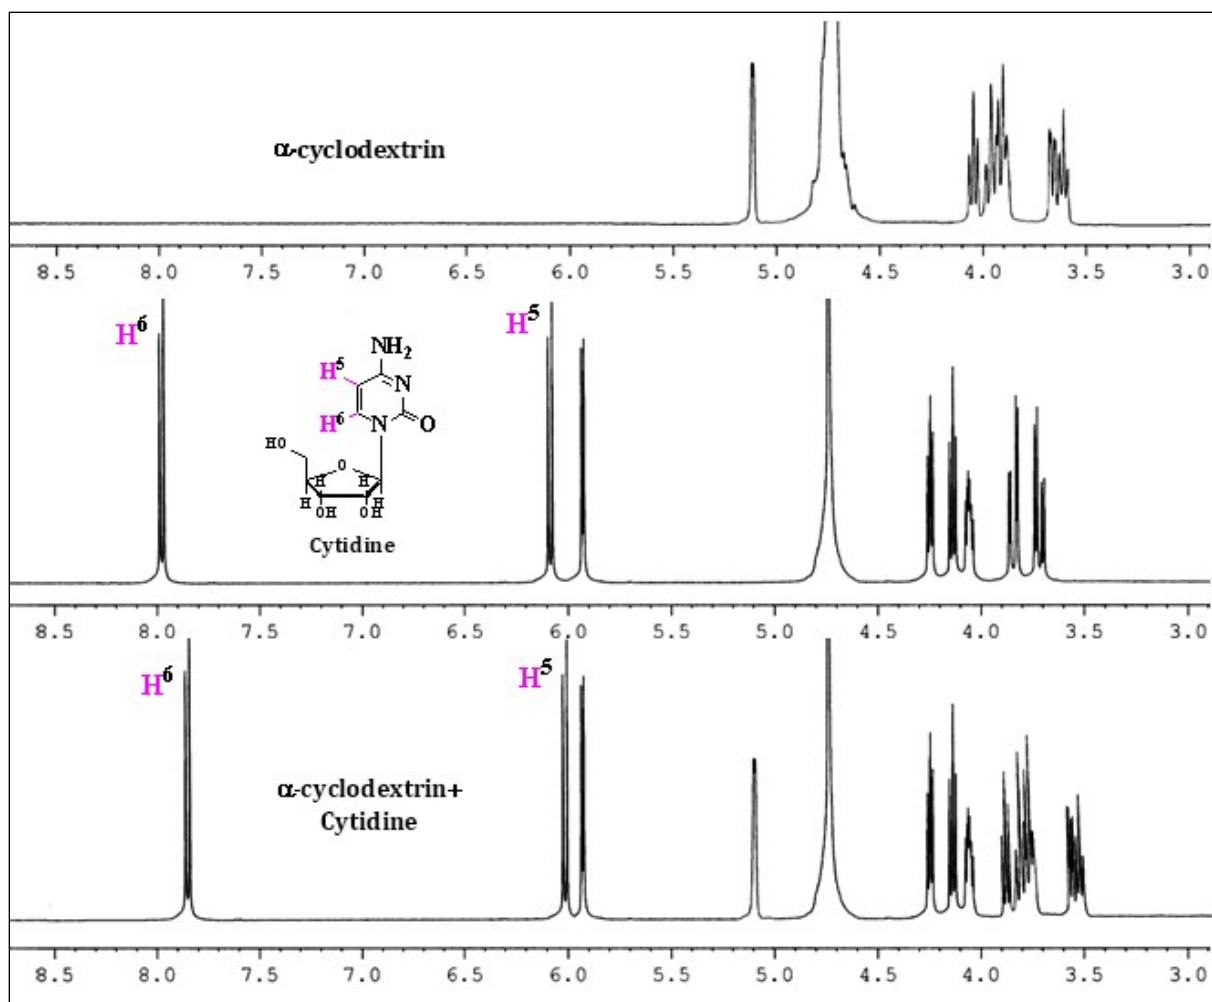

**Fig. S7**  $^1\text{H}$  NMR spectra of  $\alpha$ -CD, cytidine and 1:1 molar ratio of  $\alpha$ -CD & cytidine in  $\text{D}_2\text{O}$  at 298.15K.

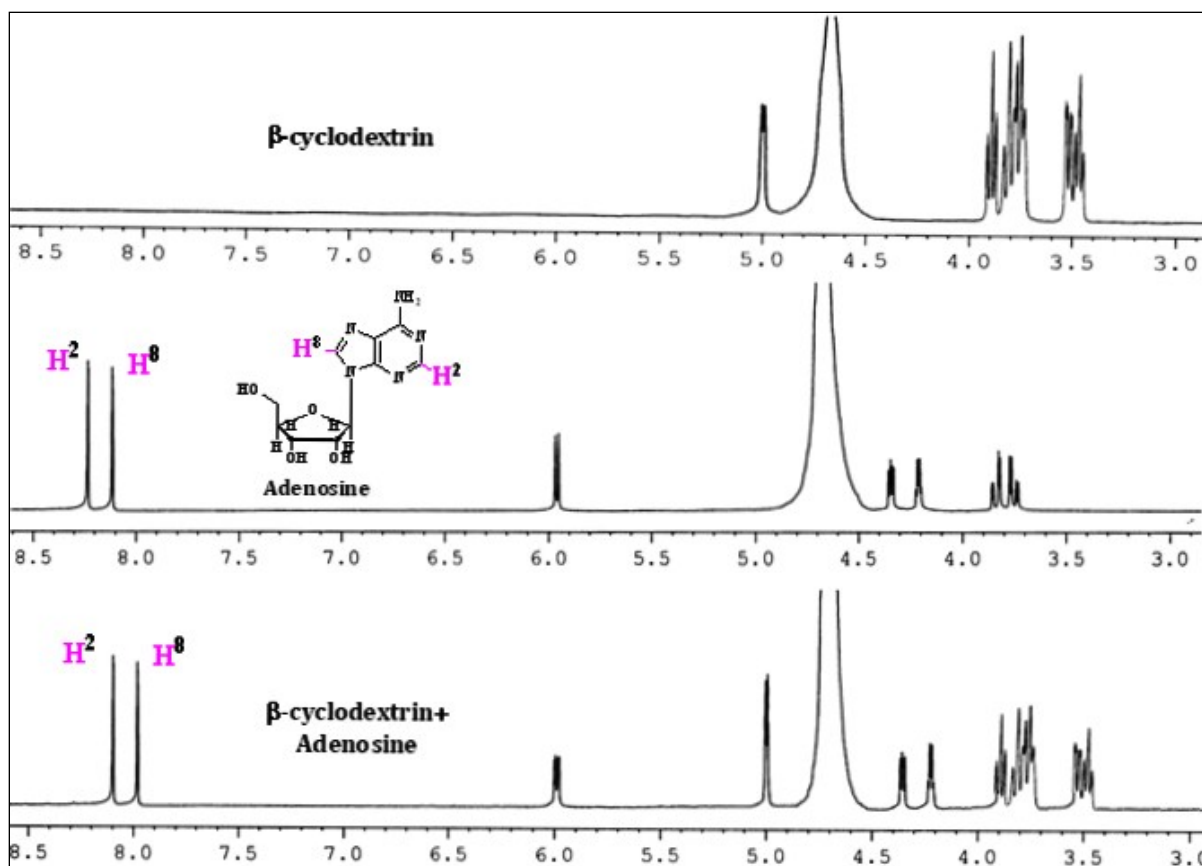

**Fig. S8**  $^1\text{H}$  NMR spectra of  $\beta$ -CD, adenosine and 1:1 molar ratio of  $\beta$ -CD & adenosine in  $\text{D}_2\text{O}$  at 298.15K.



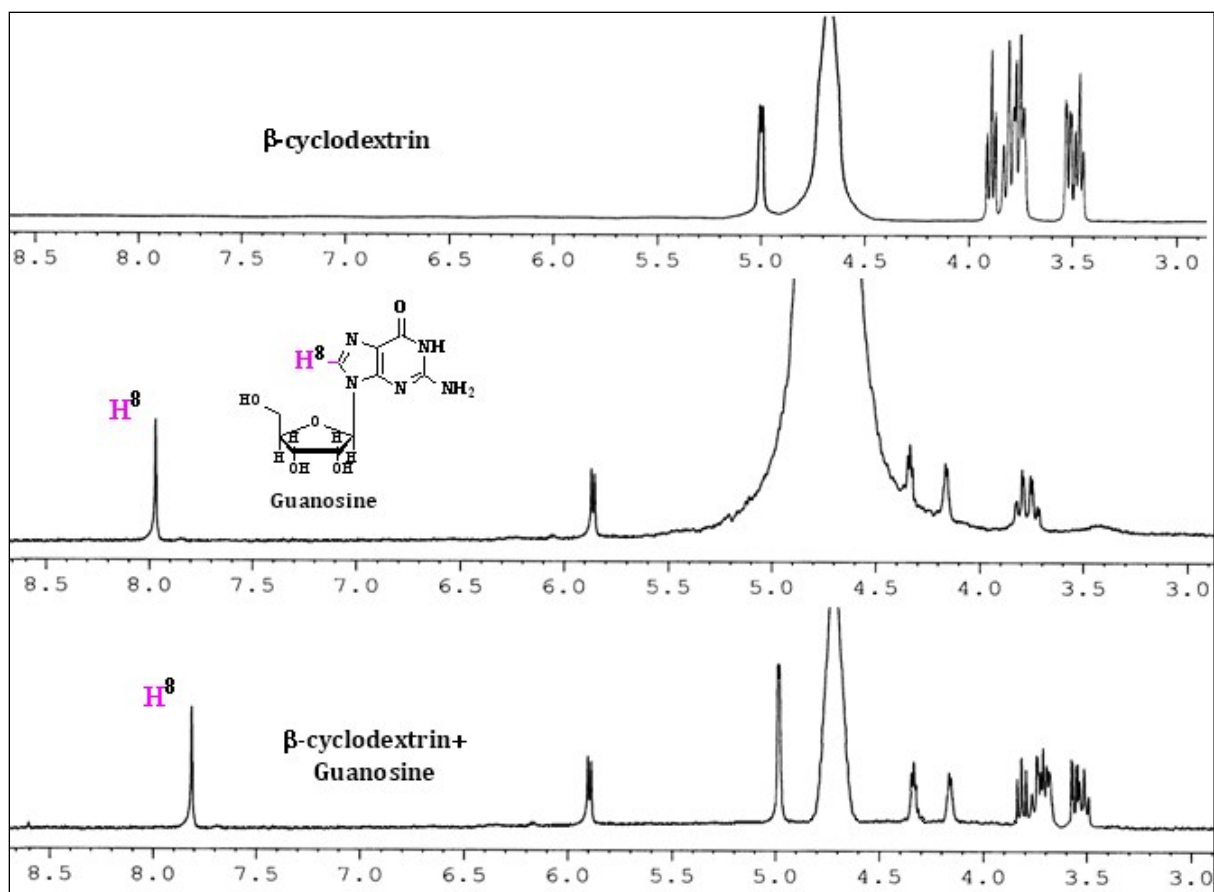

**Fig. S9** <sup>1</sup>H NMR spectra of β-CD, guanosine and 1:1 molar ratio of β-CD & guanosine in D<sub>2</sub>O at 298.15K.

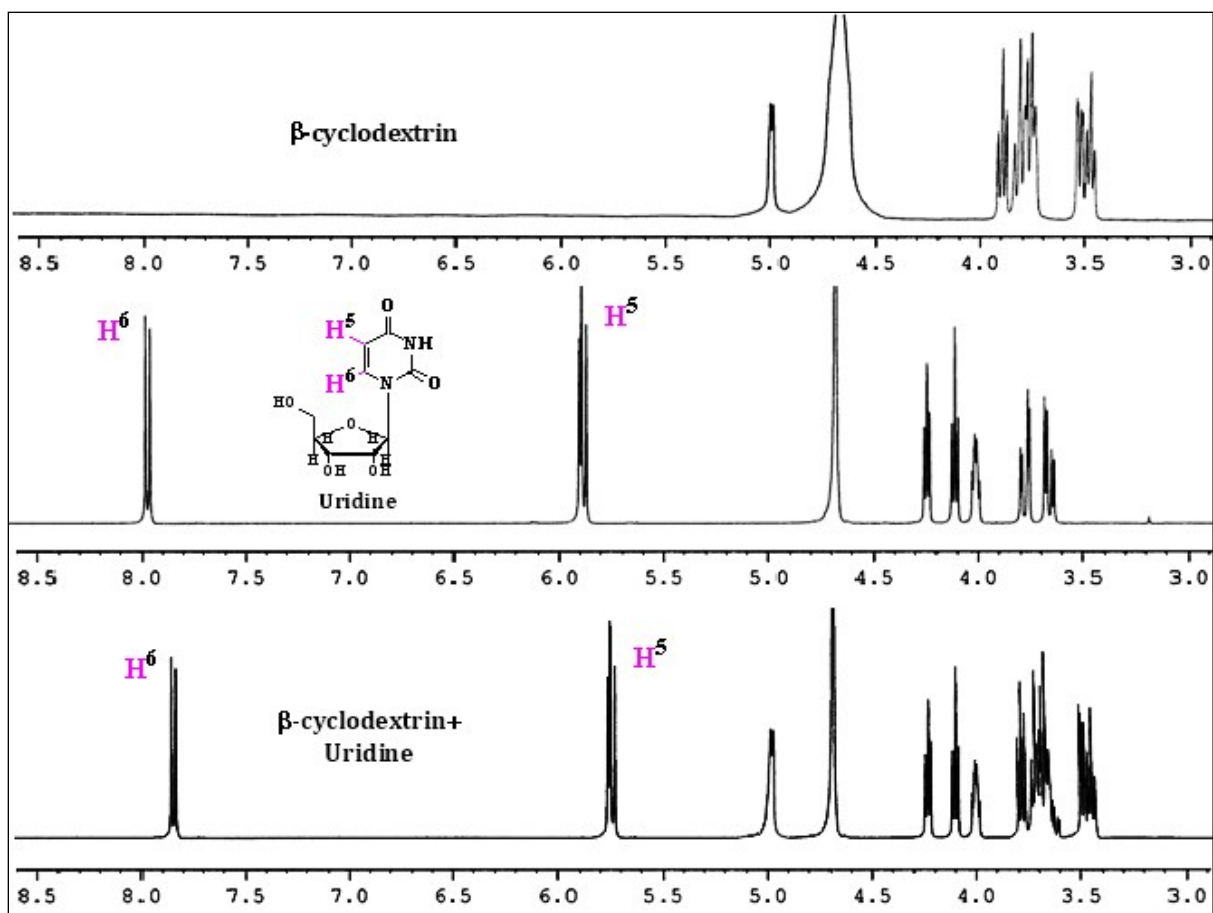

**Fig. S10**  $^1\text{H}$  NMR spectra of  $\beta$ -CD, uridine and 1:1 molar ratio of  $\beta$ -CD & uridine in  $\text{D}_2\text{O}$  at 298.15K.

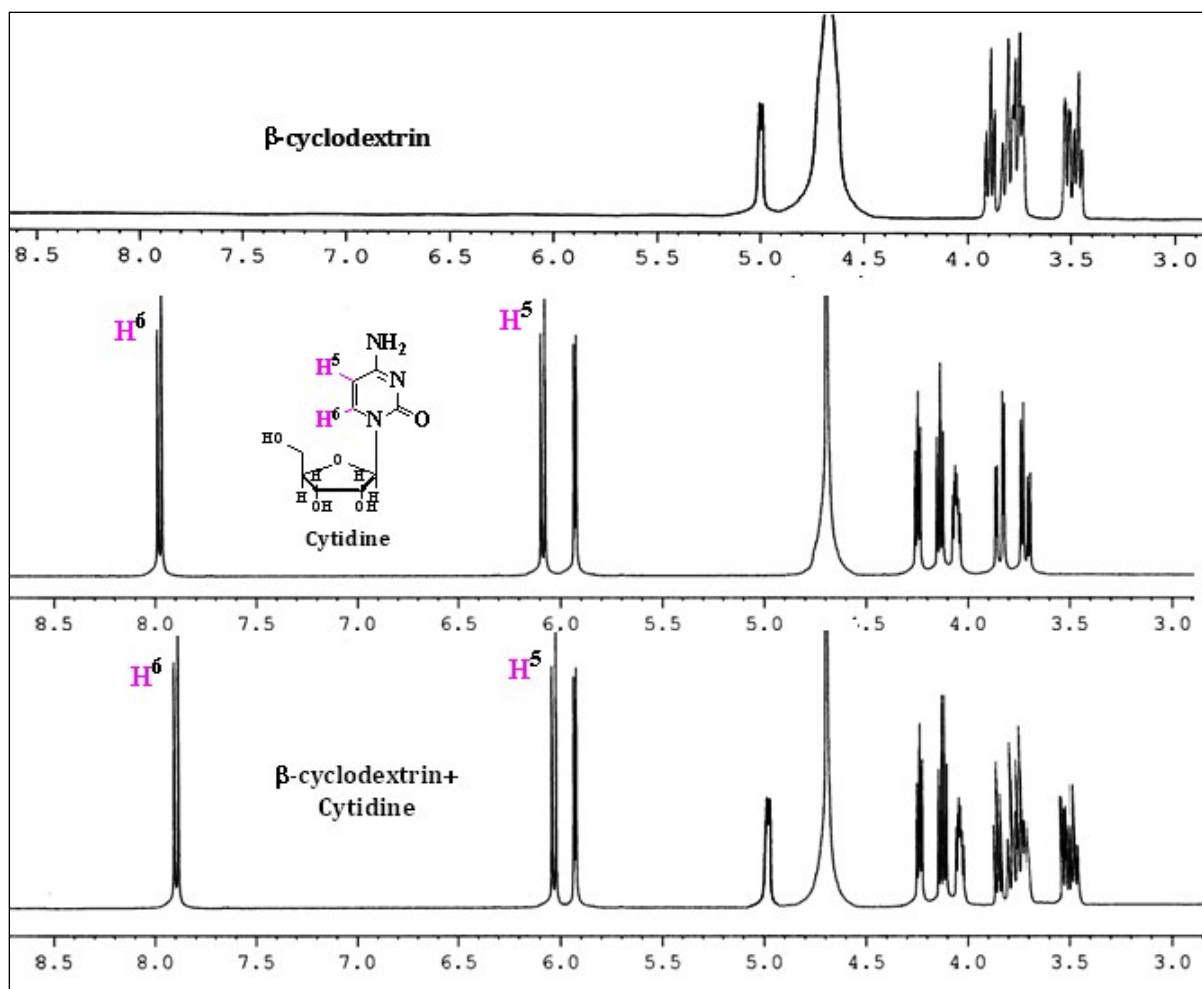

**Fig. S11**  $^1\text{H}$  NMR spectra of  $\beta$ -CD, cytidine and 1:1 molar ratio of  $\beta$ -CD & cytidine in  $\text{D}_2\text{O}$  at 298.15K.

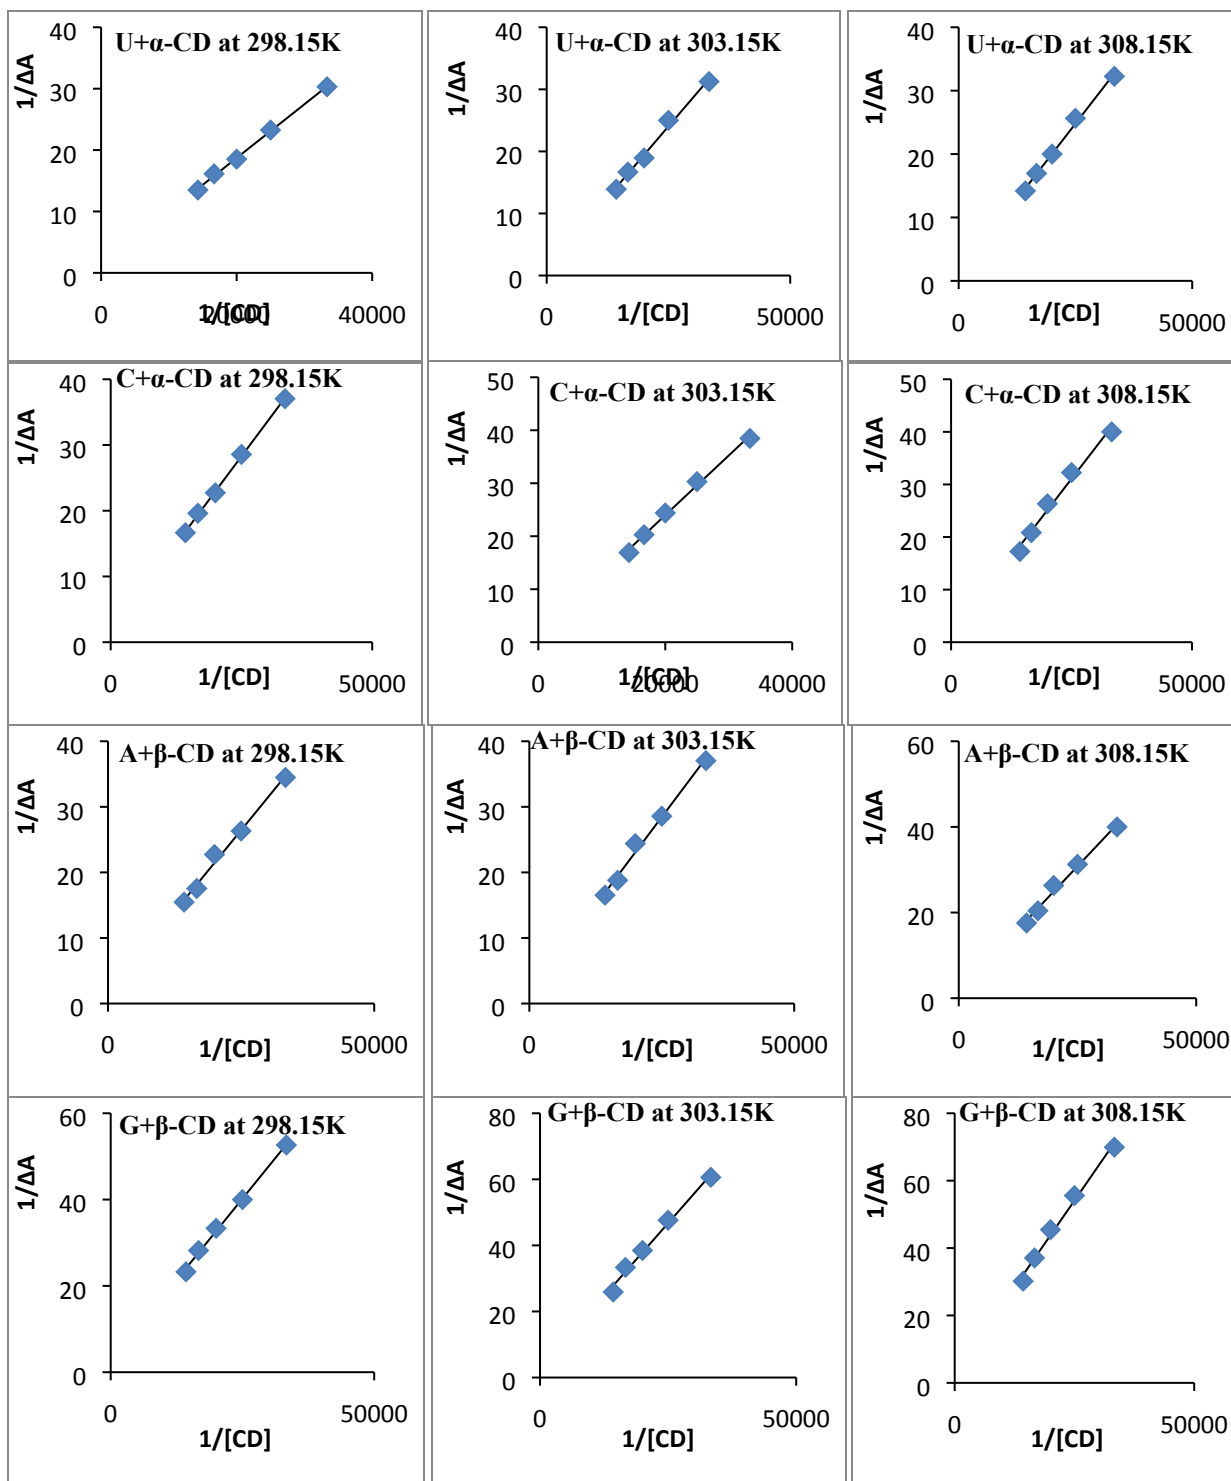

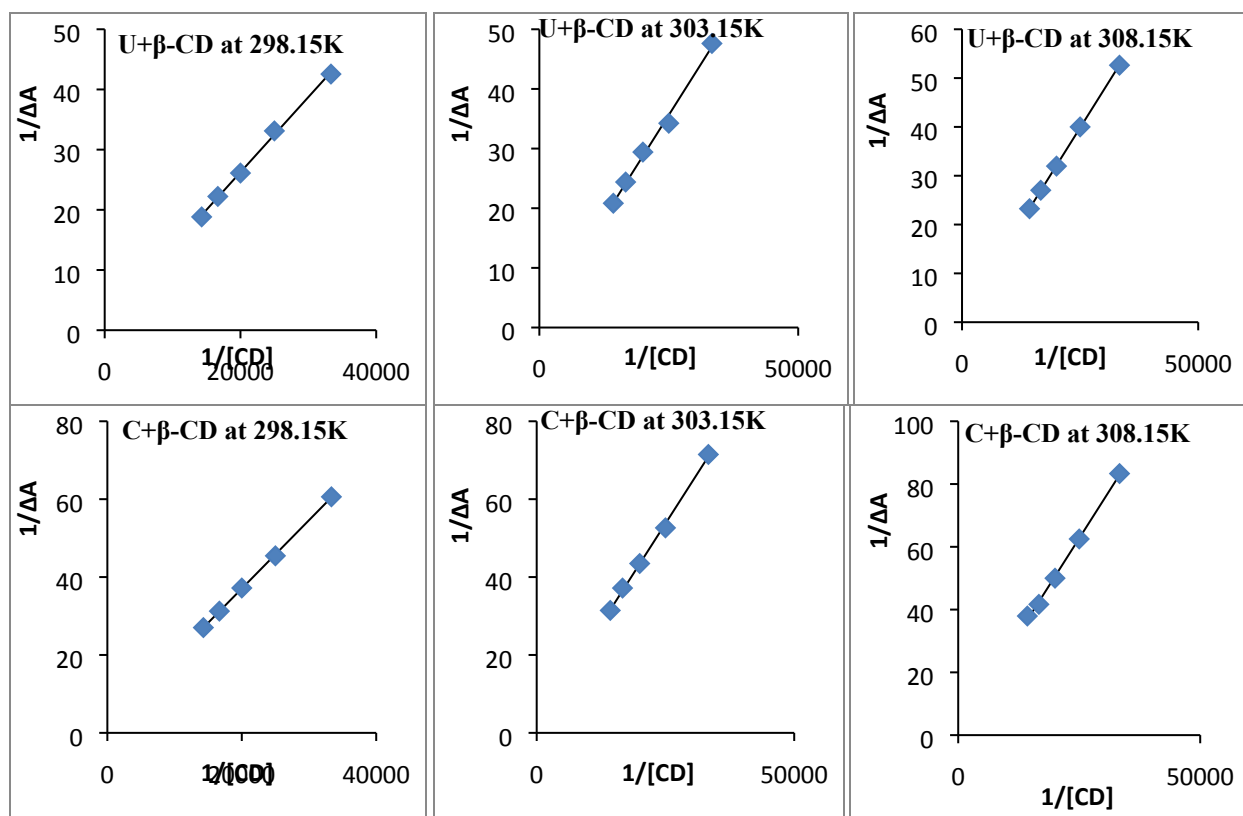

**Fig S12** Benesi-Hildebrand double reciprocal plot for the effect of  $\alpha$  and  $\beta$ -CD on the absorbance of uridine (261 nm), cytidine (270 nm), adenosine (259 nm) and guanosine (253 nm) at different temperatures.

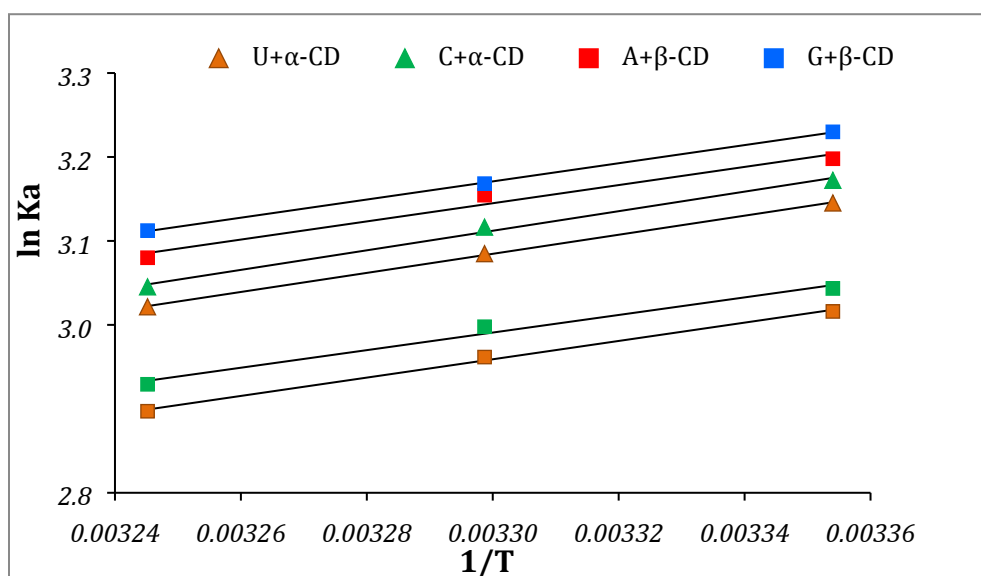

**Fig. S13** The linear relationship of  $\ln K_a$  vs.  $1/T$  for the interaction of various nucleosides with  $\alpha$  and  $\beta$ -CD.
